# Supplementary material
Source: PubMed Central journal article supplement (PMC9849144)
Supplement: mmc1.pdf [file mmc1.pdf]

# THE LANCET

## Global Health

### Supplementary appendix

This appendix formed part of the original submission and has been peer reviewed. We post it as supplied by the authors.

Supplement to: Singh D, Vignat J, Lorenzoni V, et al. Global estimates of incidence and mortality of cervical cancer in 2020: a baseline analysis of the WHO Global Cervical Cancer Elimination Initiative. *Lancet Glob Health* 2022; published online Dec 14. [https://doi.org/10.1016/S2214-109X\(22\)00501-0](https://doi.org/10.1016/S2214-109X(22)00501-0).

ASIR, 95% CI

- Eastern Africa
- Middle Africa
- Northern Africa
- Southern Africa
- Western Africa
- Caribbean
- Central America
- South America
- Northern America
- Eastern Asia
- All but China
- China
- South-Eastern Asia
- South Central Asia
- All but India
- India
- Western Asia
- Central-Eastern Europe
- Northern Europe
- Southern Europe
- Western Europe
- Australia/New Zealand
- Melanesia
- Micronesia/Polynesia
- Low HDI
- Medium HDI
- High HDI
- Very high HDI
- World

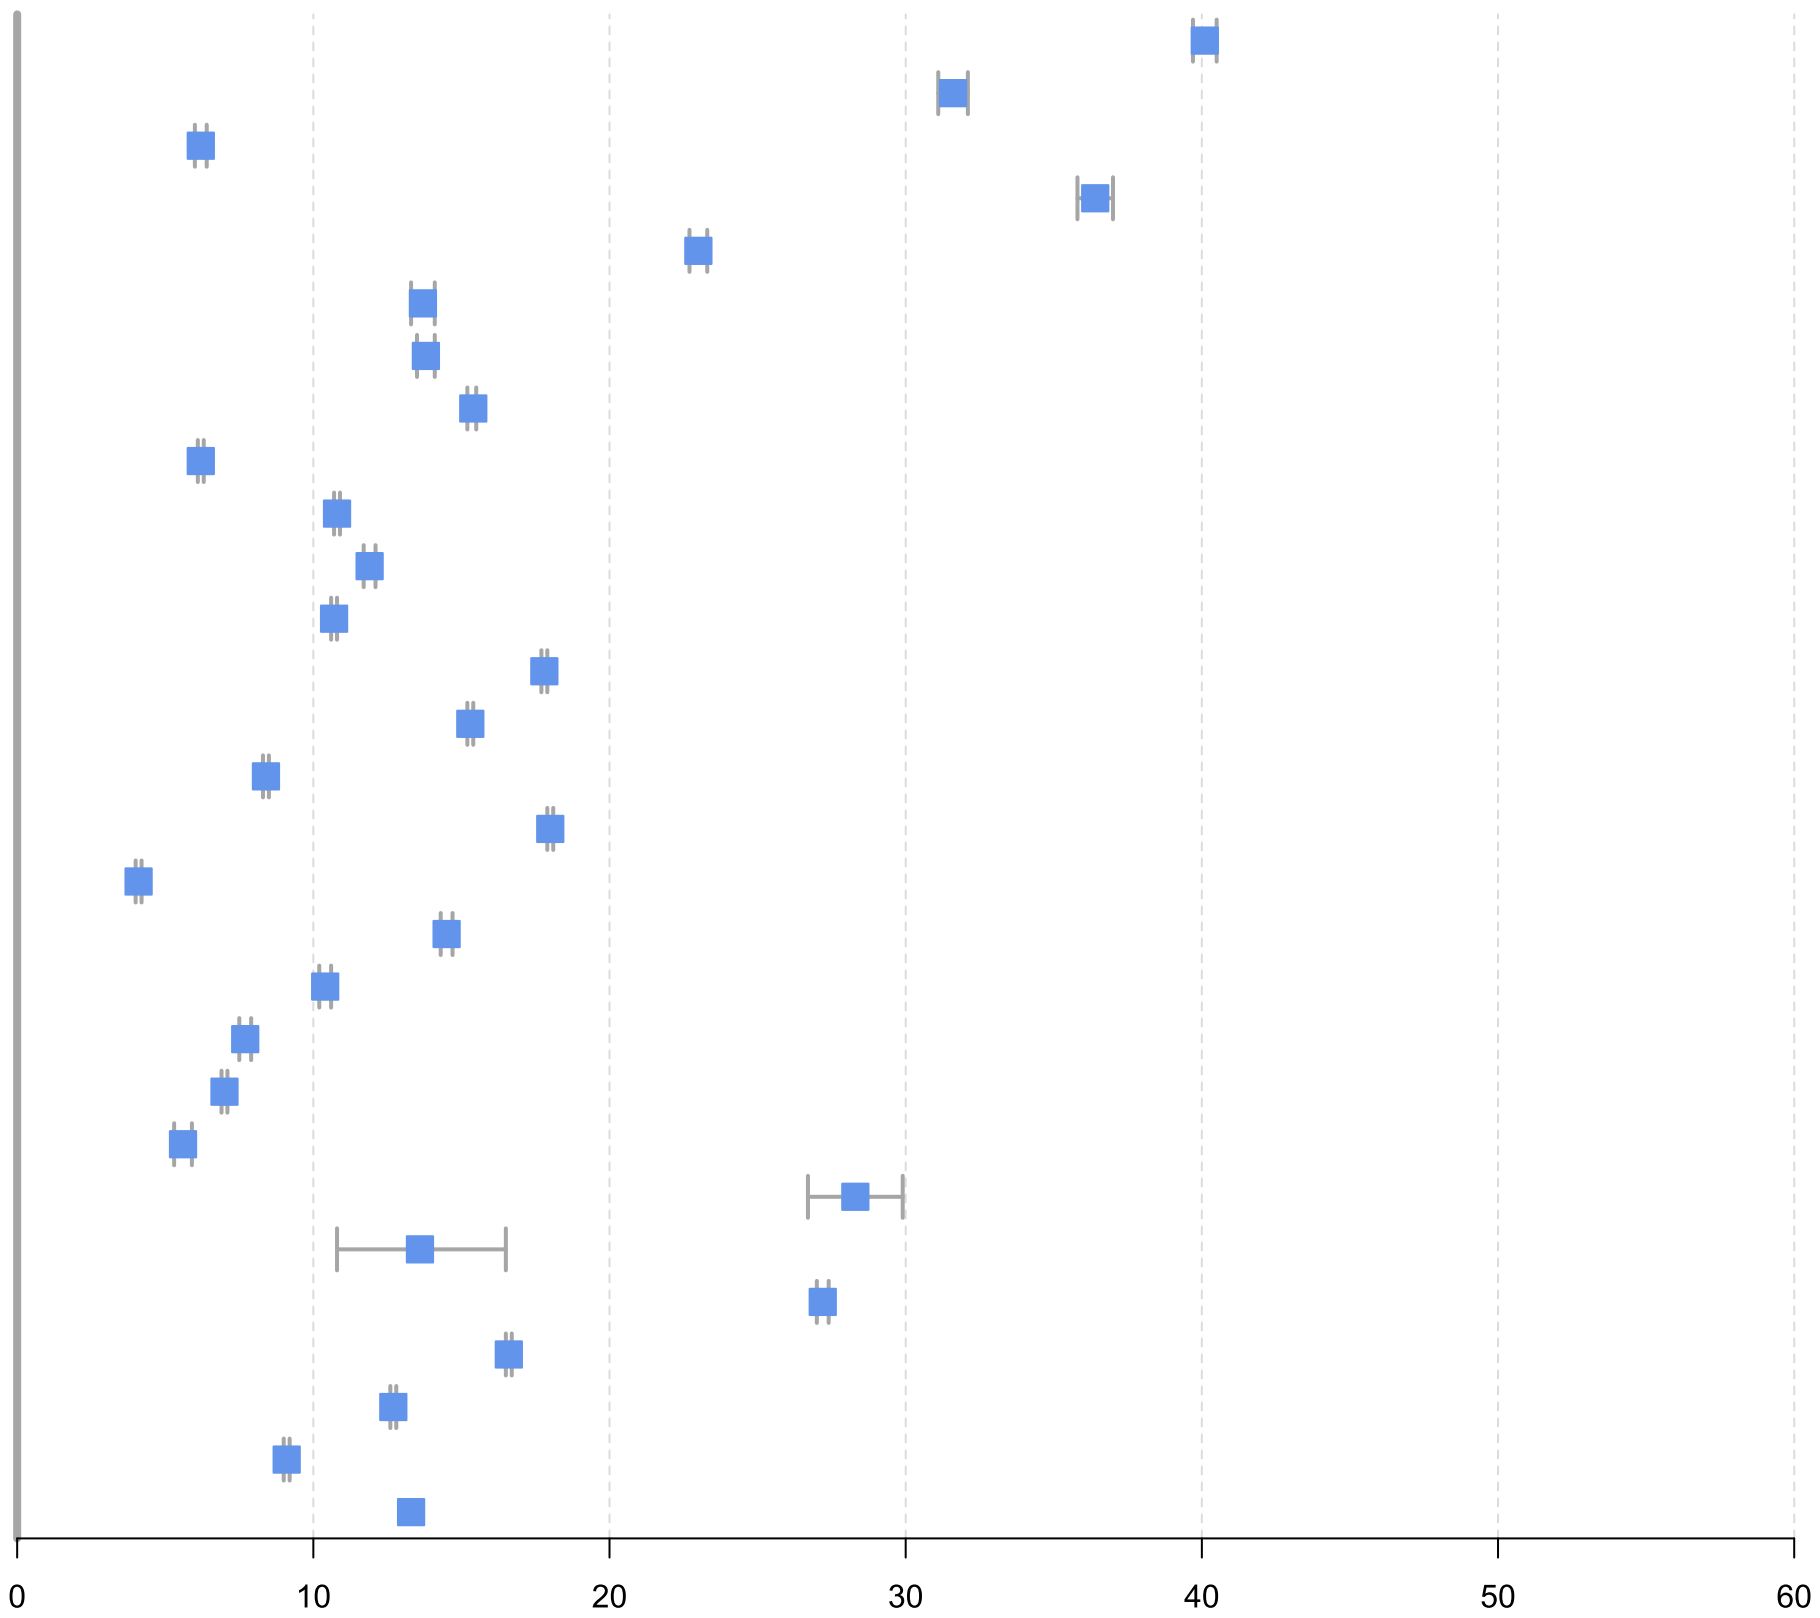

ASMR, 95% CI

- Eastern Africa
- Middle Africa
- Northern Africa
- Southern Africa
- Western Africa
- Caribbean
- Central America
- South America
- Northern America
- Eastern Asia
- All but China
- China
- South-Eastern Asia
- South Central Asia
- All but India
- India
- Western Asia
- Central-Eastern Europe
- Northern Europe
- Southern Europe
- Western Europe
- Australia/New Zealand
- Melanesia
- Micronesia/Polynesia
- Low HDI
- Medium HDI
- High HDI
- Very high HDI
- World

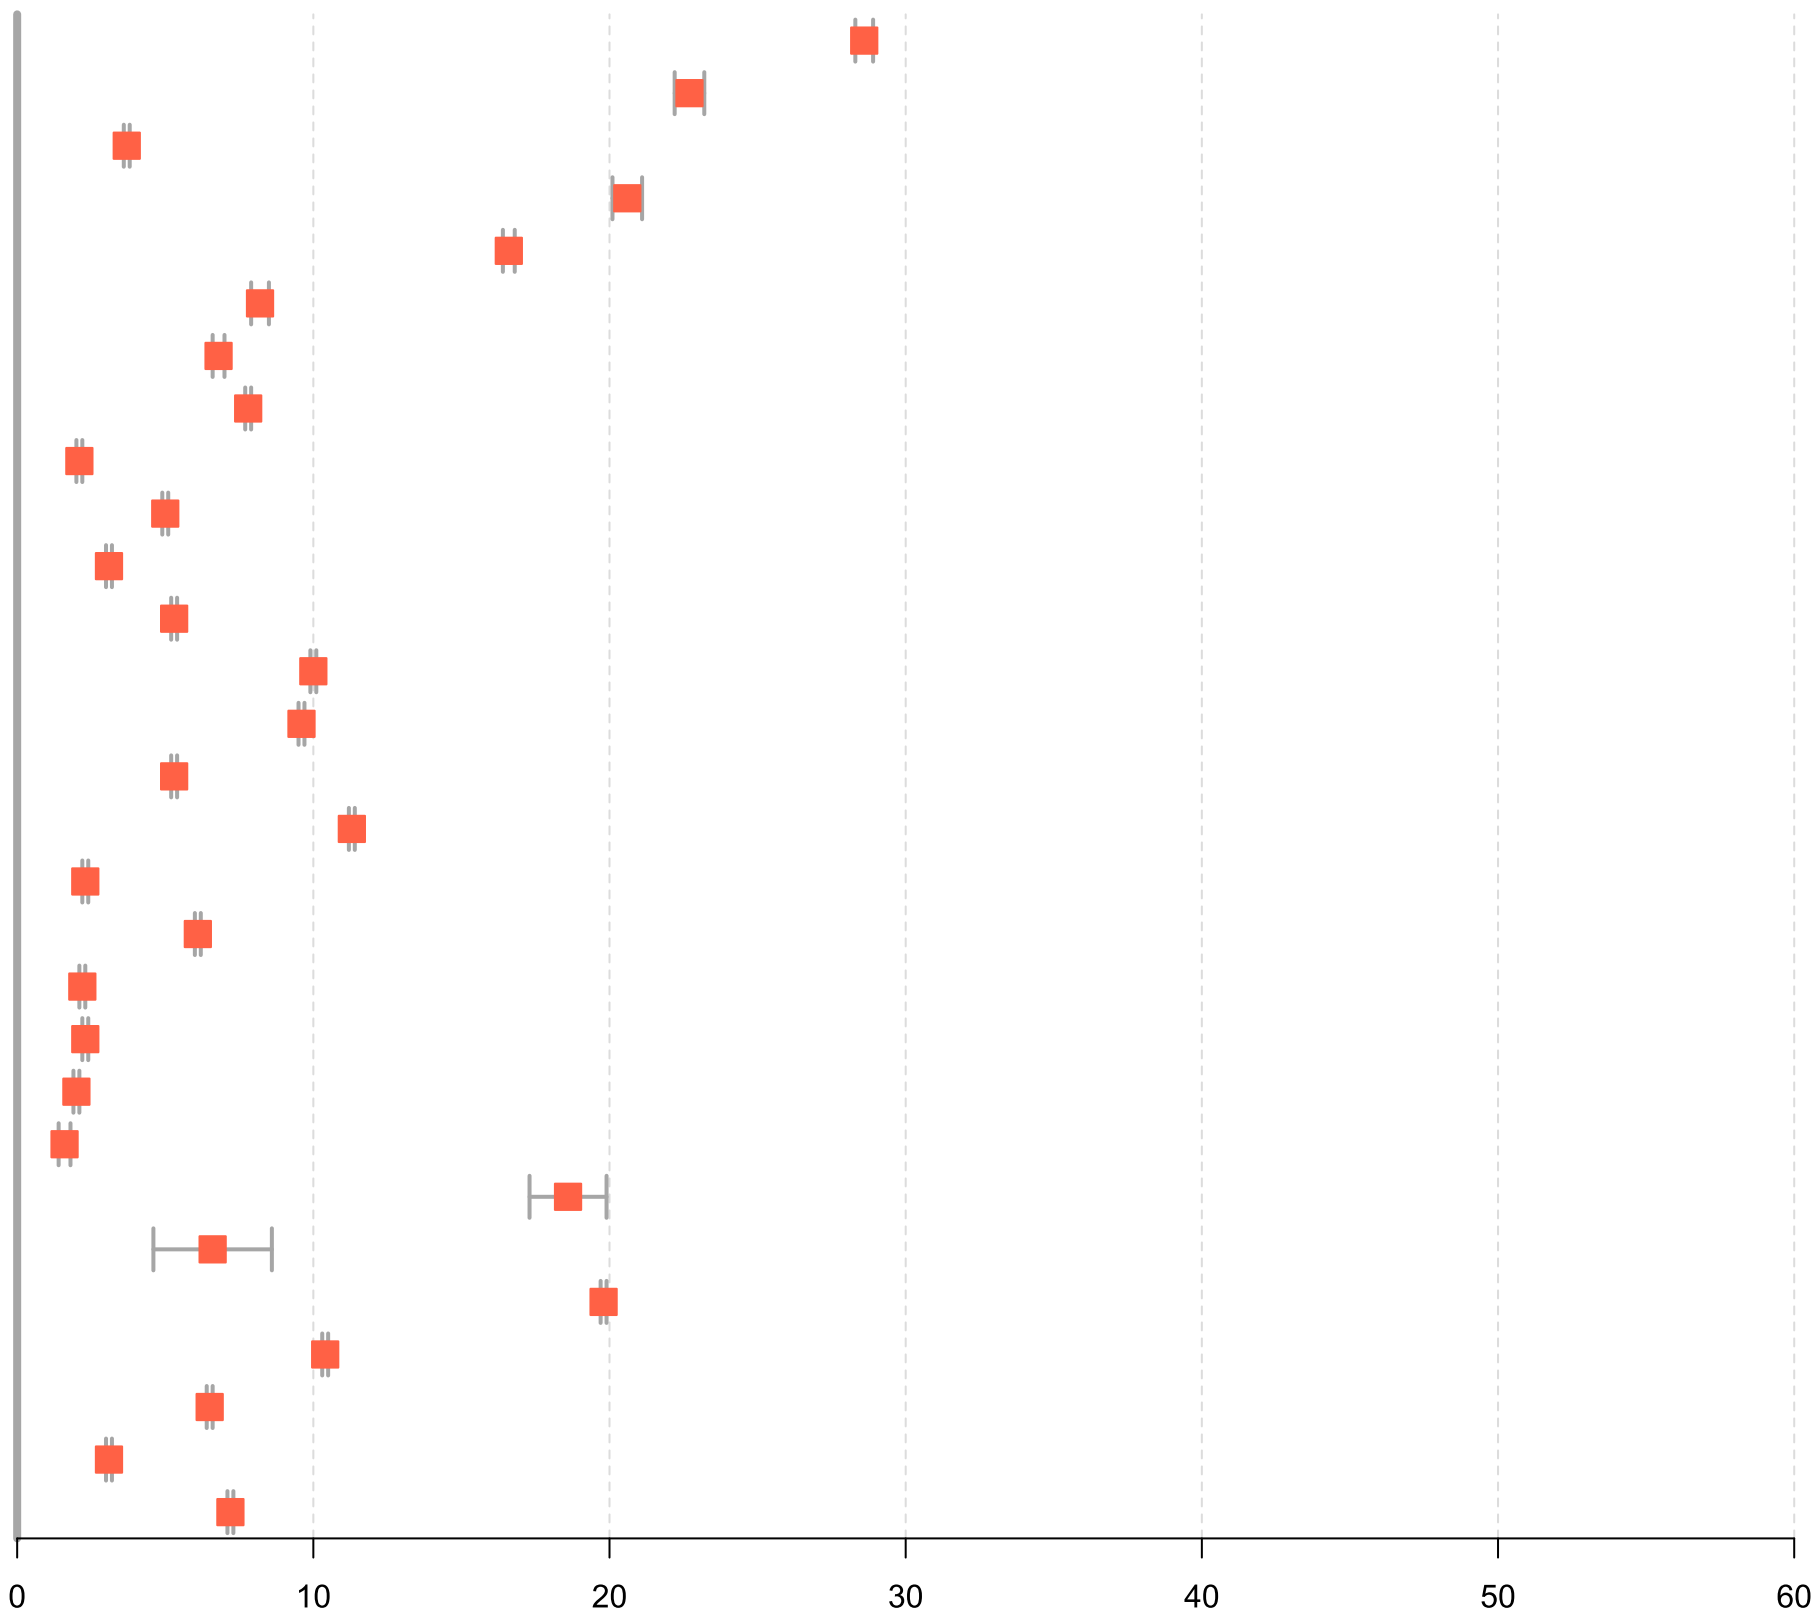

- Burundi
- Comoros
- Djibouti
- Eritrea
- Ethiopia
- Kenya
- La Reunion
- Madagascar
- Malawi
- Mauritius
- Mozambique
- Rwanda
- Somalia
- South Sudan
- Tanzania
- Uganda
- Zambia
- Zimbabwe
- Angola
- Cameroon
- Central African Republic
- Chad
- Democratic People Republic of Congo
- Equatorial Guinea
- Gabon
- Republic of Congo
- Sao Tome and Principe
- Algeria
- Egypt
- Libya
- Morocco
- Sudan
- Tunisia
- Botswana
- Eswatini
- Lesotho
- Namibia
- South Africa
- Benin
- Burkina Faso
- Cape Verde
- Cote d'Ivoire
- Ghana
- Guinea
- Guinea-Bissau
- Liberia
- Mali
- Mauritania
- Niger
- Nigeria
- Senegal
- Sierra Leone
- The Gambia
- Togo

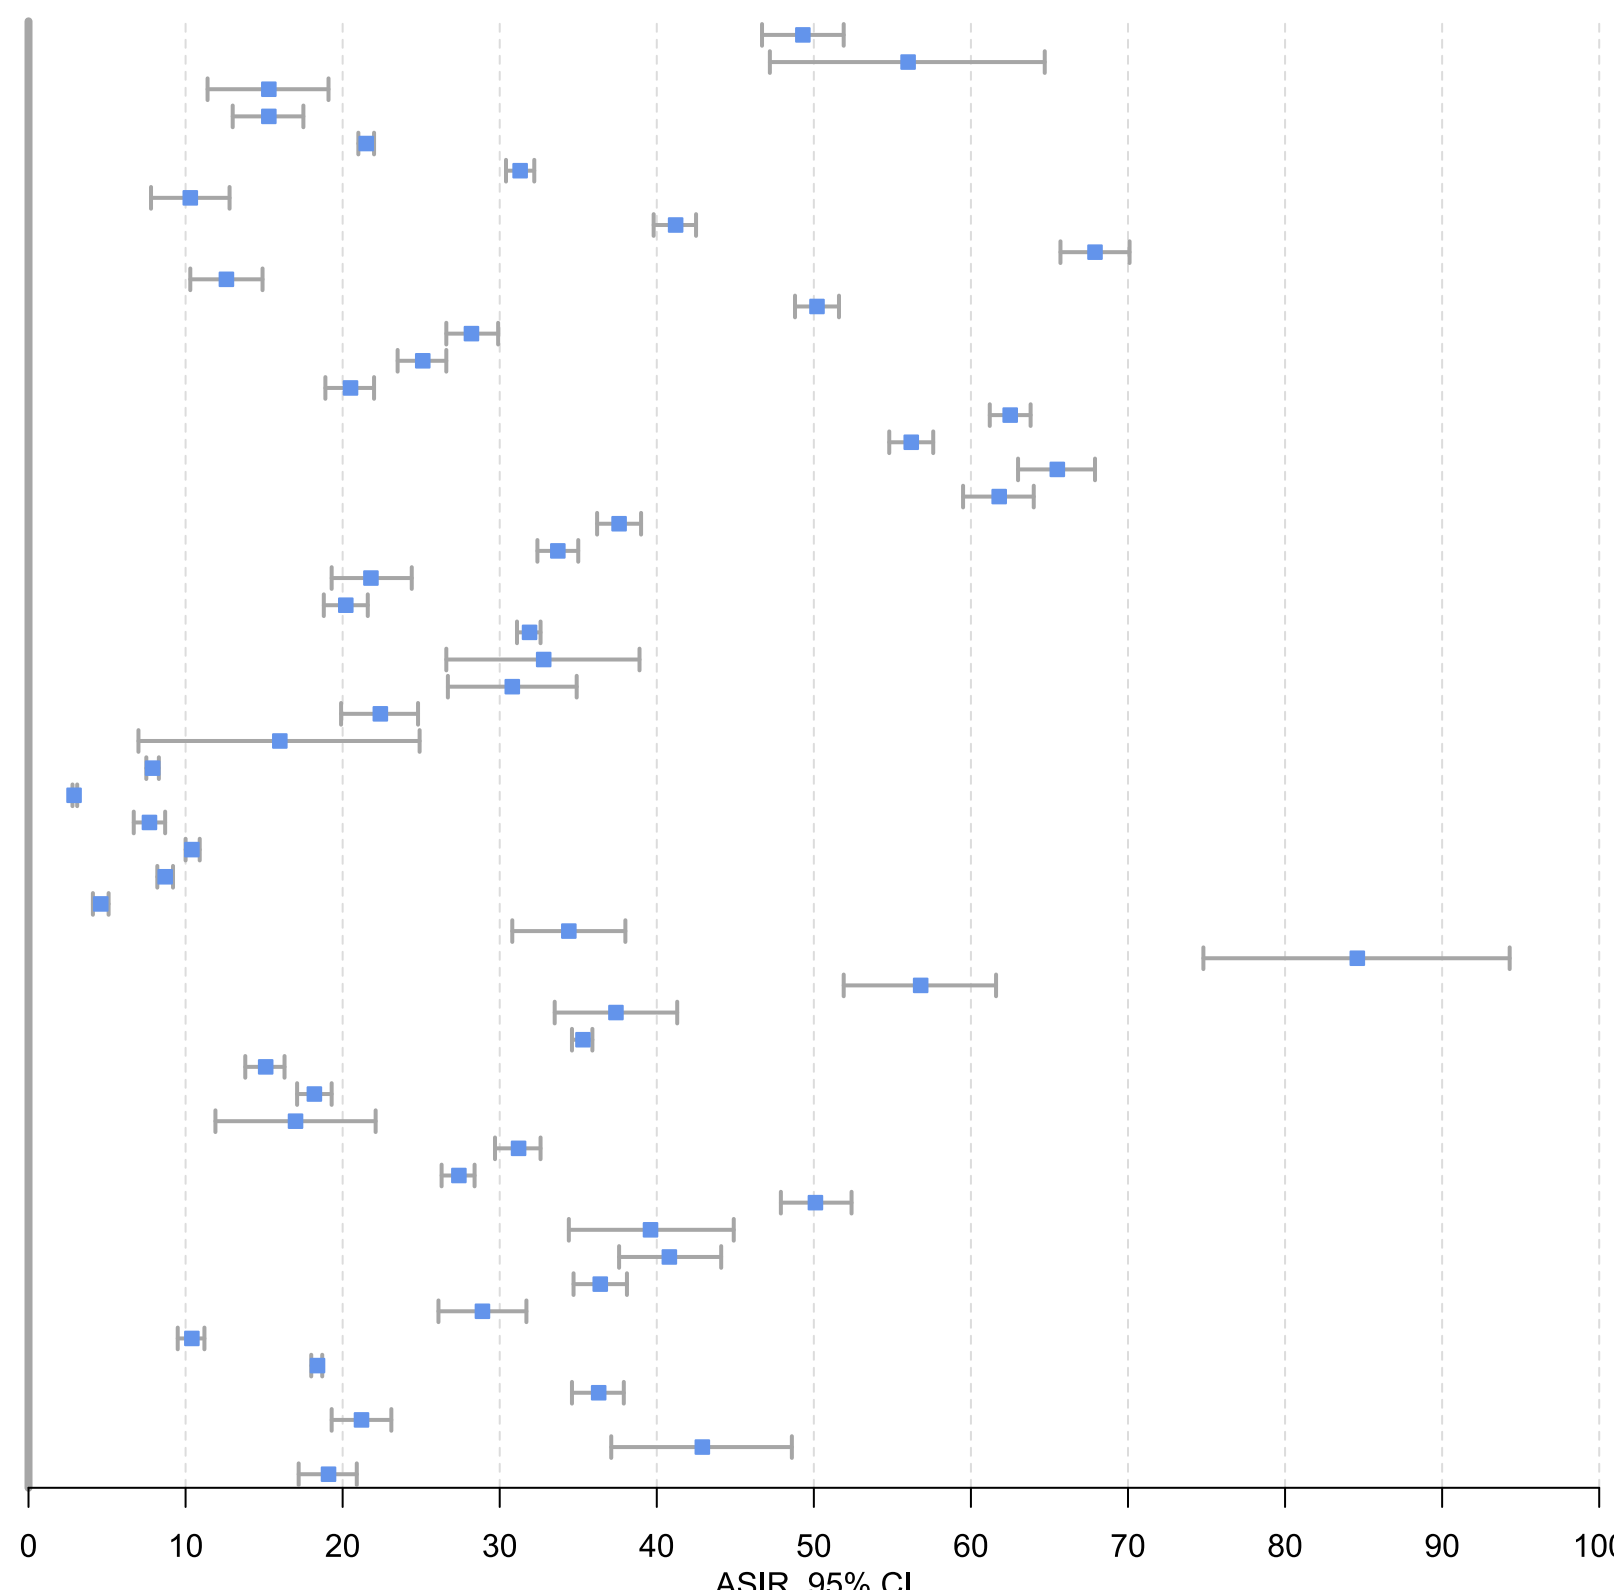

- Bahamas
- Barbados
- Cuba
- Dominican Republic
- Guadeloupe
- Haiti
- Jamaica
- Martinique
- Puerto Rico
- Saint Lucia
- Trinidad and Tobago
- Belize
- Costa Rica
- El Salvador
- Guatemala
- Honduras
- Mexico
- Nicaragua
- Panama
- Argentina
- Bolivia
- Brazil
- Chile
- Colombia
- Ecuador
- French Guyana
- Guyana
- Paraguay
- Peru
- Suriname
- Uruguay
- Venezuela
- Canada
- United States of America
- Australia
- New Zealand
- Fiji
- New Caledonia
- Papua New Guinea
- Solomon Islands
- Vanuatu
- Guam
- French Polynesia
- Samoa

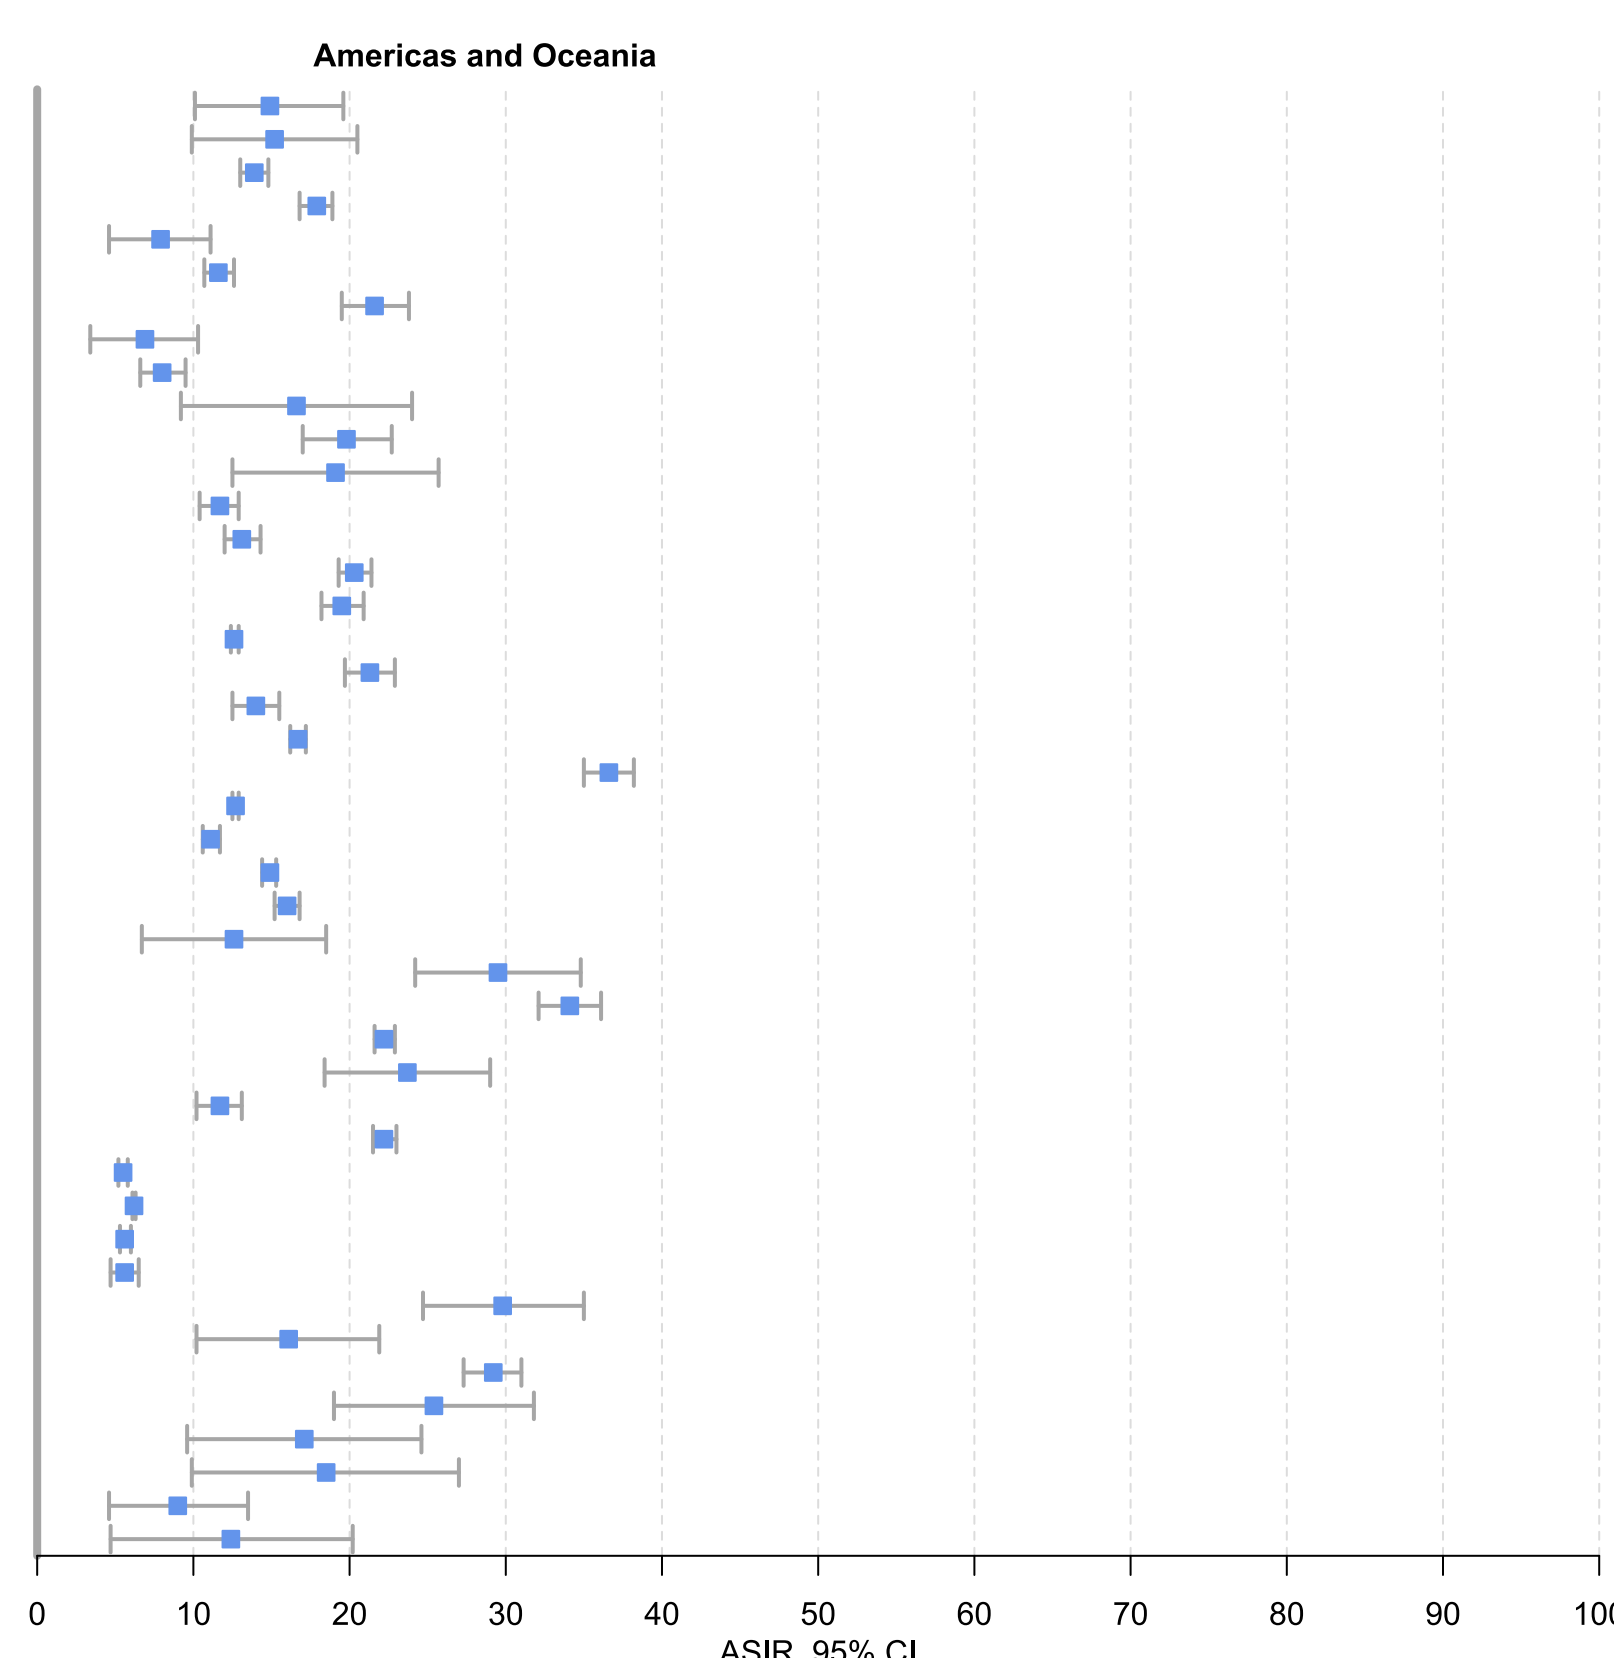

Page 2

- China
- Democratic People Republic of Korea
- Japan
- Mongolia
- Republic of Korea
- Afghanistan
- Bangladesh
- Bhutan
- India
- Islamic Republic of Iran
- Kazakhstan
- Kyrgyzstan
- Maldives
- Nepal
- Pakistan
- Sri Lanka
- Tajikistan
- Turkmenistan
- Uzbekistan
- Brunei Darussalam
- Cambodia
- Indonesia
- Lao People Democratic Republic
- Malaysia
- Myanmar
- Philippines
- Singapore
- Thailand
- Timor-Leste
- Viet Nam
- Armenia
- Azerbaijan
- Bahrain
- Georgia
- Iraq
- Israel
- Jordan
- Kuwait
- Lebanon
- Oman
- Palestine
- Qatar
- Saudi Arabia
- Syrian Arab Republic
- Turkey
- United Arab Emirates
- Yemen

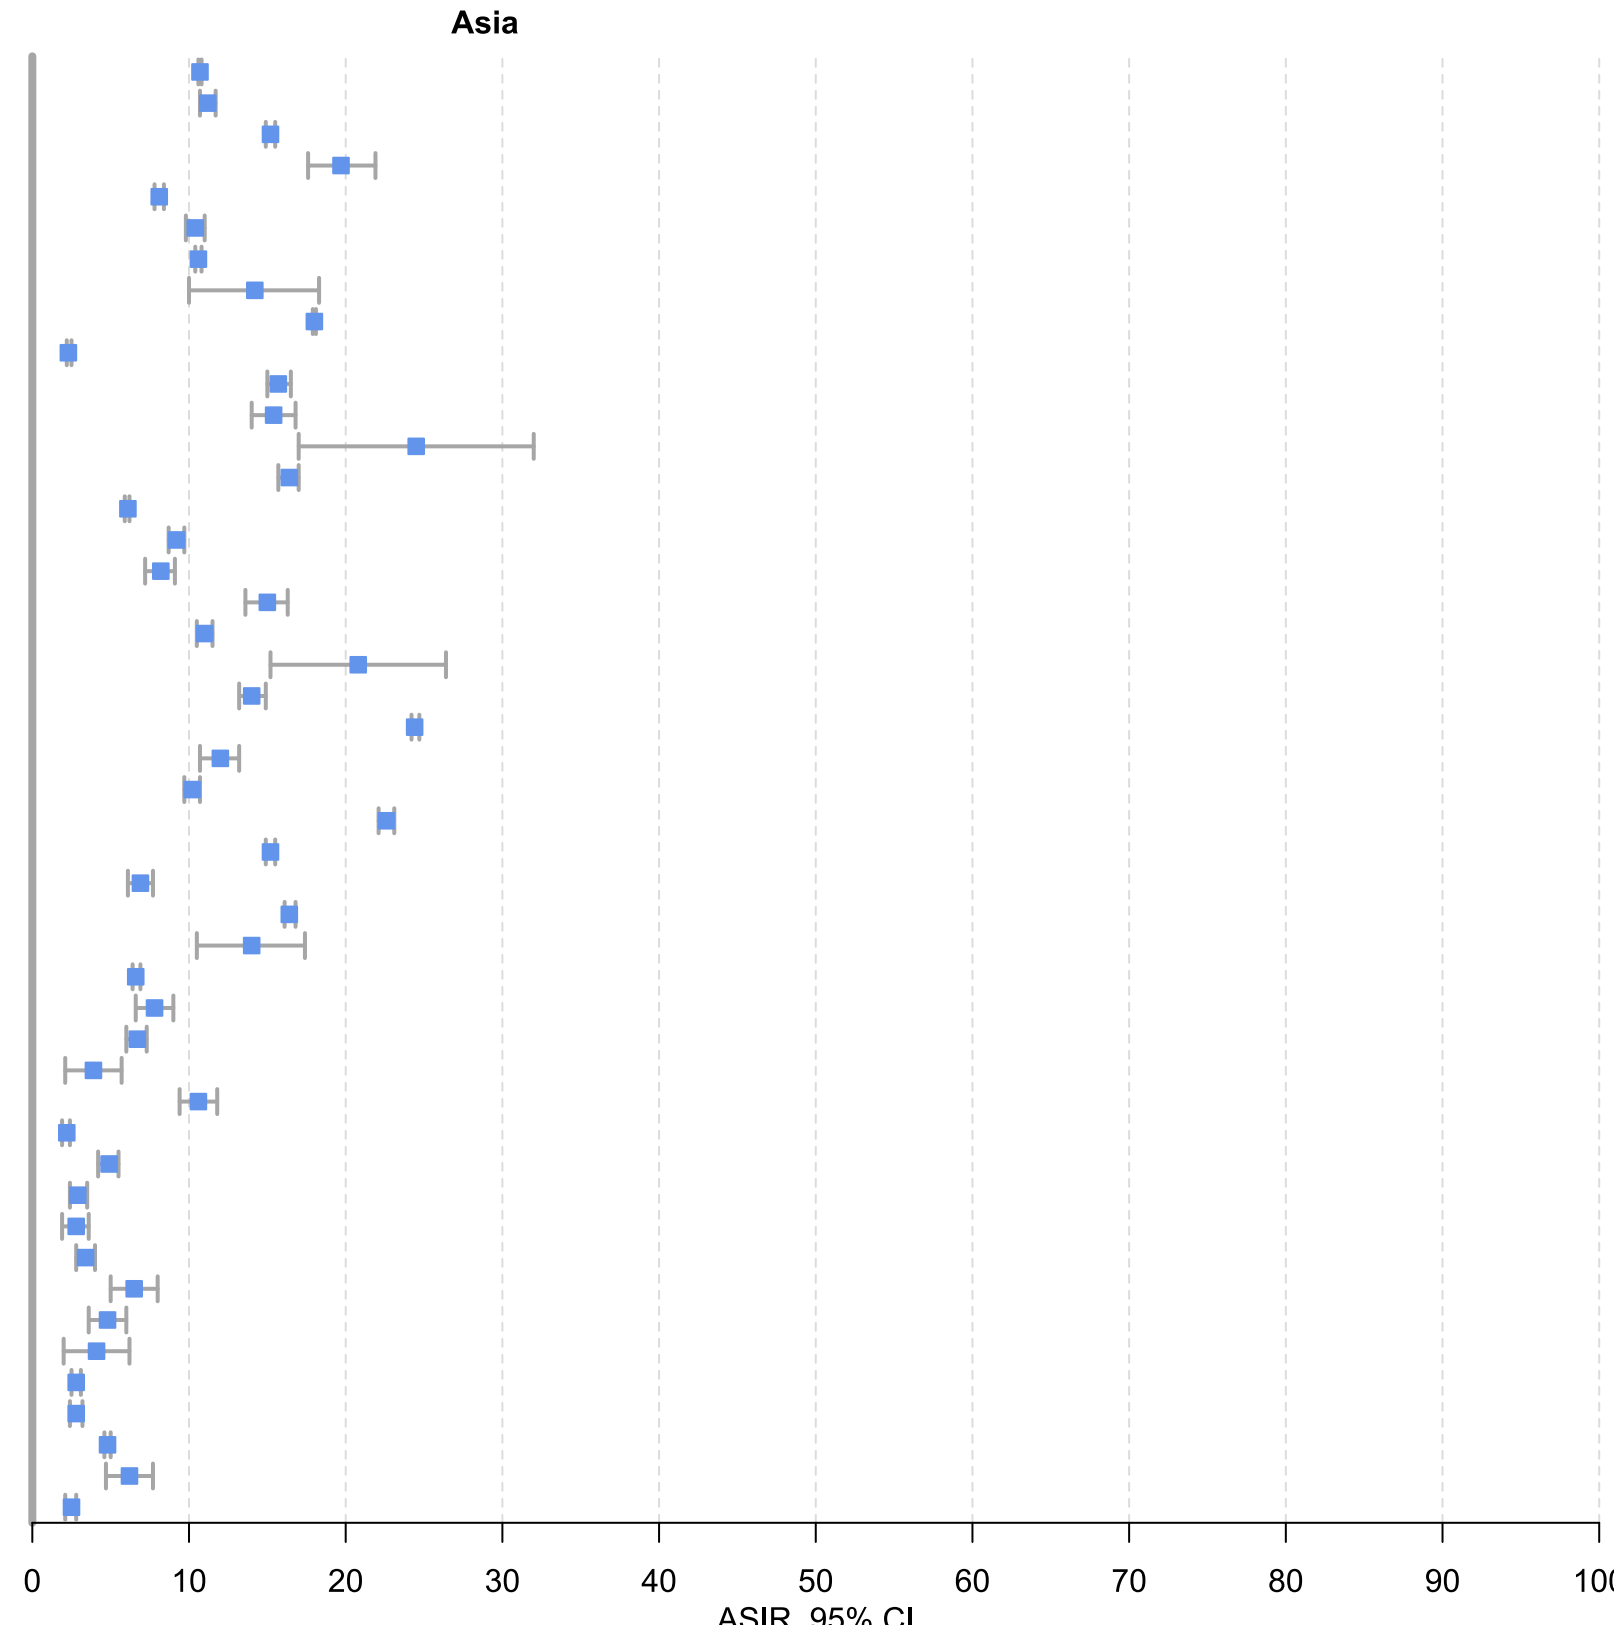

- Belarus
- Bulgaria
- Czechia
- Hungary
- Moldova
- Poland
- Romania
- Russian Federation
- Slovakia
- Ukraine
- Denmark
- Estonia
- Finland
- Iceland
- Ireland
- Latvia
- Lithuania
- Norway
- Sweden
- United Kingdom
- Albania
- Bosnia Herzegovina
- Croatia
- Cyprus
- Greece
- Italy
- Malta
- Montenegro
- North Macedonia
- Portugal
- Serbia
- Slovenia
- Spain
- Austria
- Belgium
- France (metropolitan)
- Germany
- Luxembourg
- Netherlands
- Switzerland

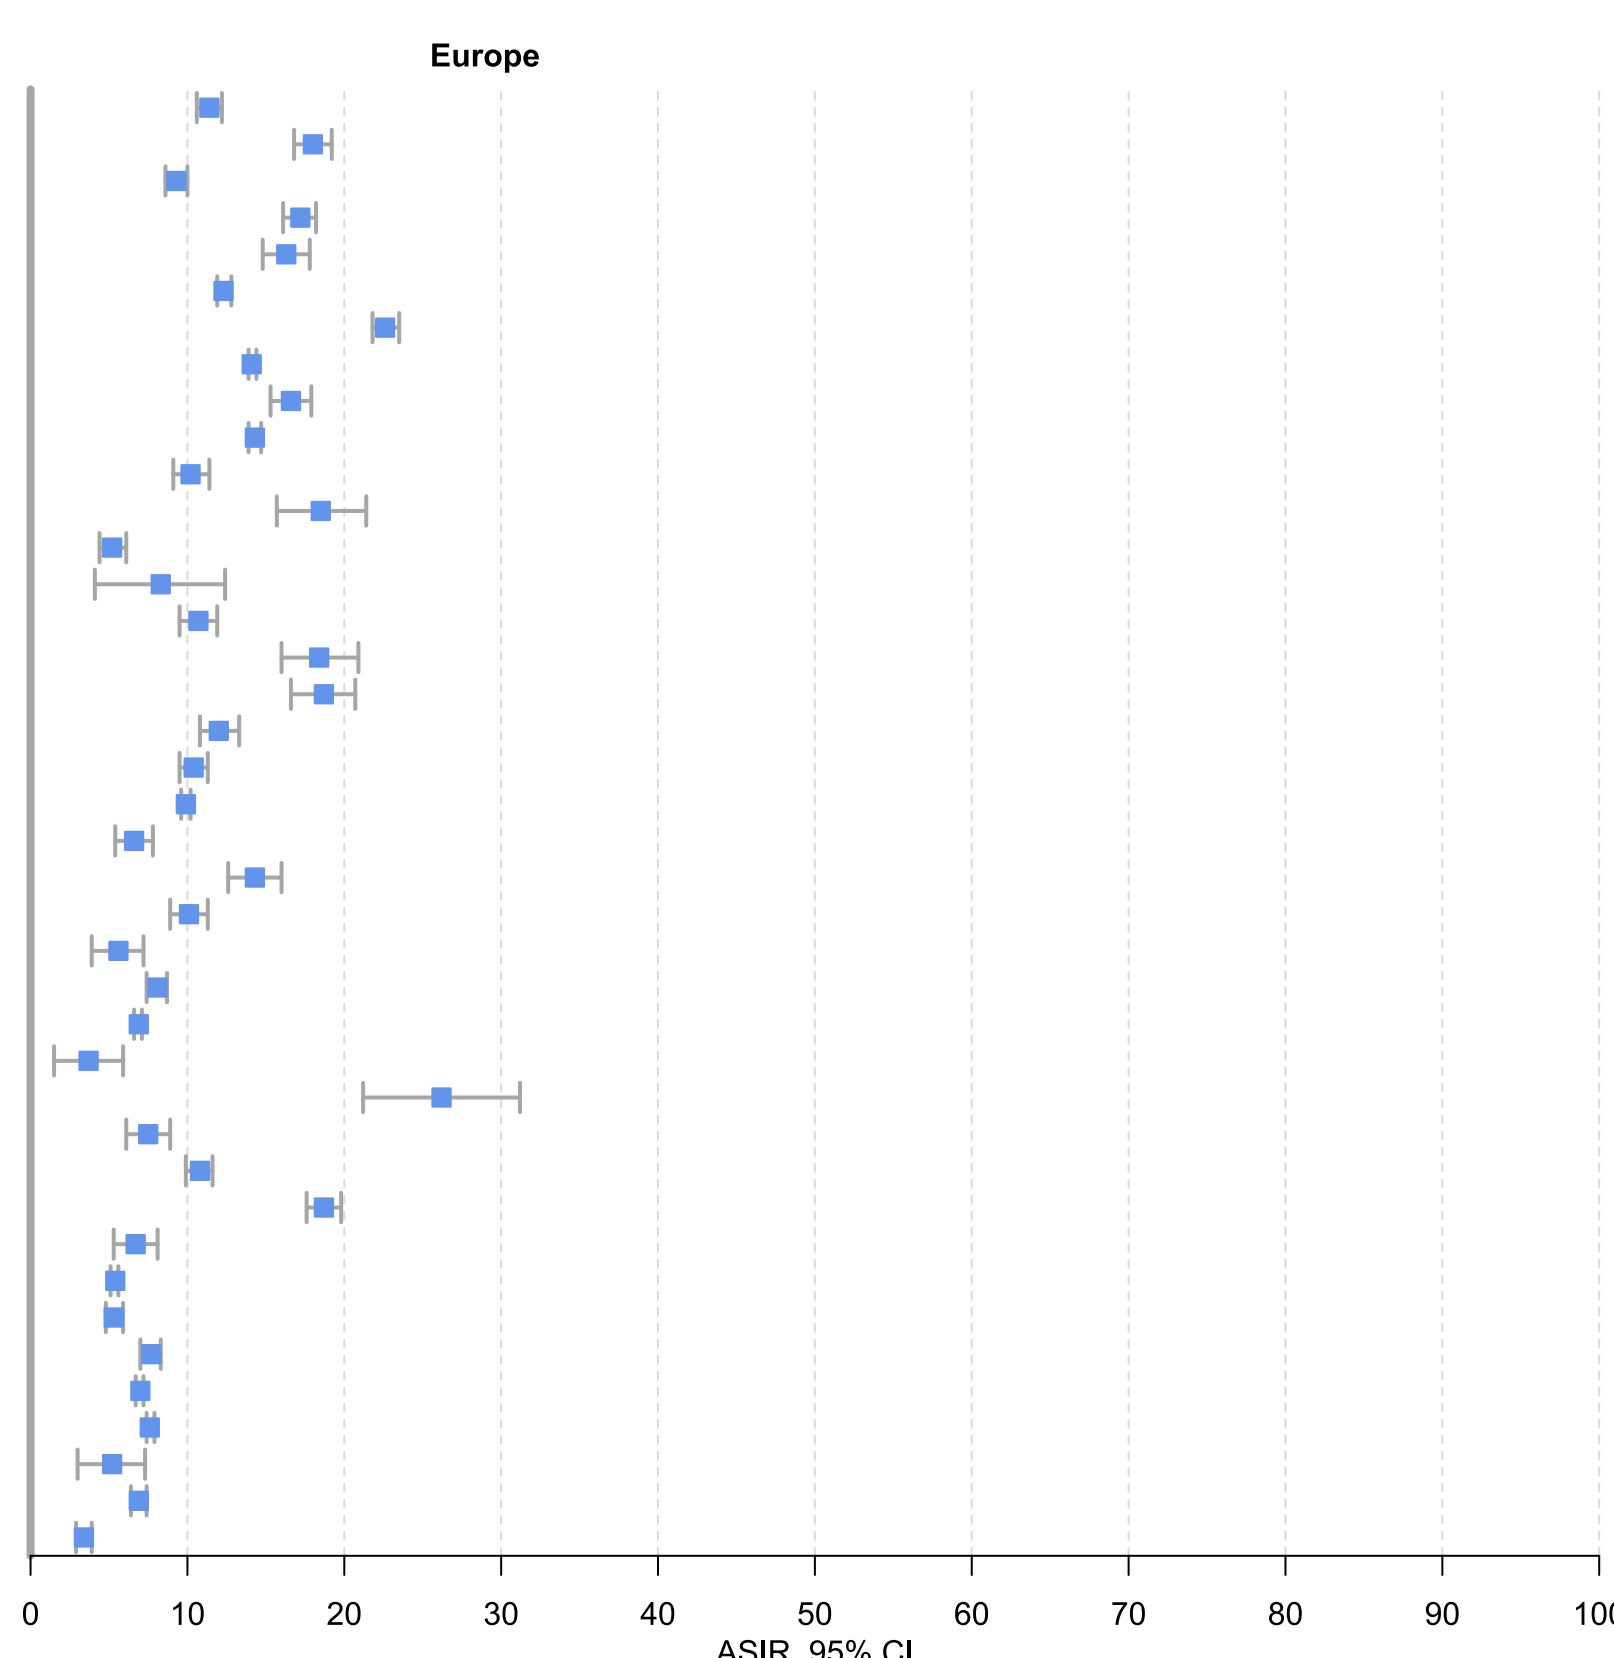

Page 3

### Africa

- Burundi
- Comoros
- Djibouti
- Eritrea
- Ethiopia
- Kenya
- La Reunion
- Madagascar
- Malawi
- Mauritius
- Mozambique
- Rwanda
- Somalia
- South Sudan
- Tanzania
- Uganda
- Zambia
- Zimbabwe
- Angola
- Cameroon
- Central African Republic
- Chad
- Democratic People Republic of Congo
- Equatorial Guinea
- Gabon
- Republic of Congo
- Sao Tome and Principe
- Algeria
- Egypt
- Libya
- Morocco
- Sudan
- Tunisia
- Botswana
- Eswatini
- Lesotho
- Namibia
- South Africa
- Benin
- Burkina Faso
- Cape Verde
- Cote d'Ivoire
- Ghana
- Guinea
- Guinea-Bissau
- Liberia
- Mali
- Mauritania
- Niger
- Nigeria
- Senegal
- Sierra Leone
- The Gambia
- Togo

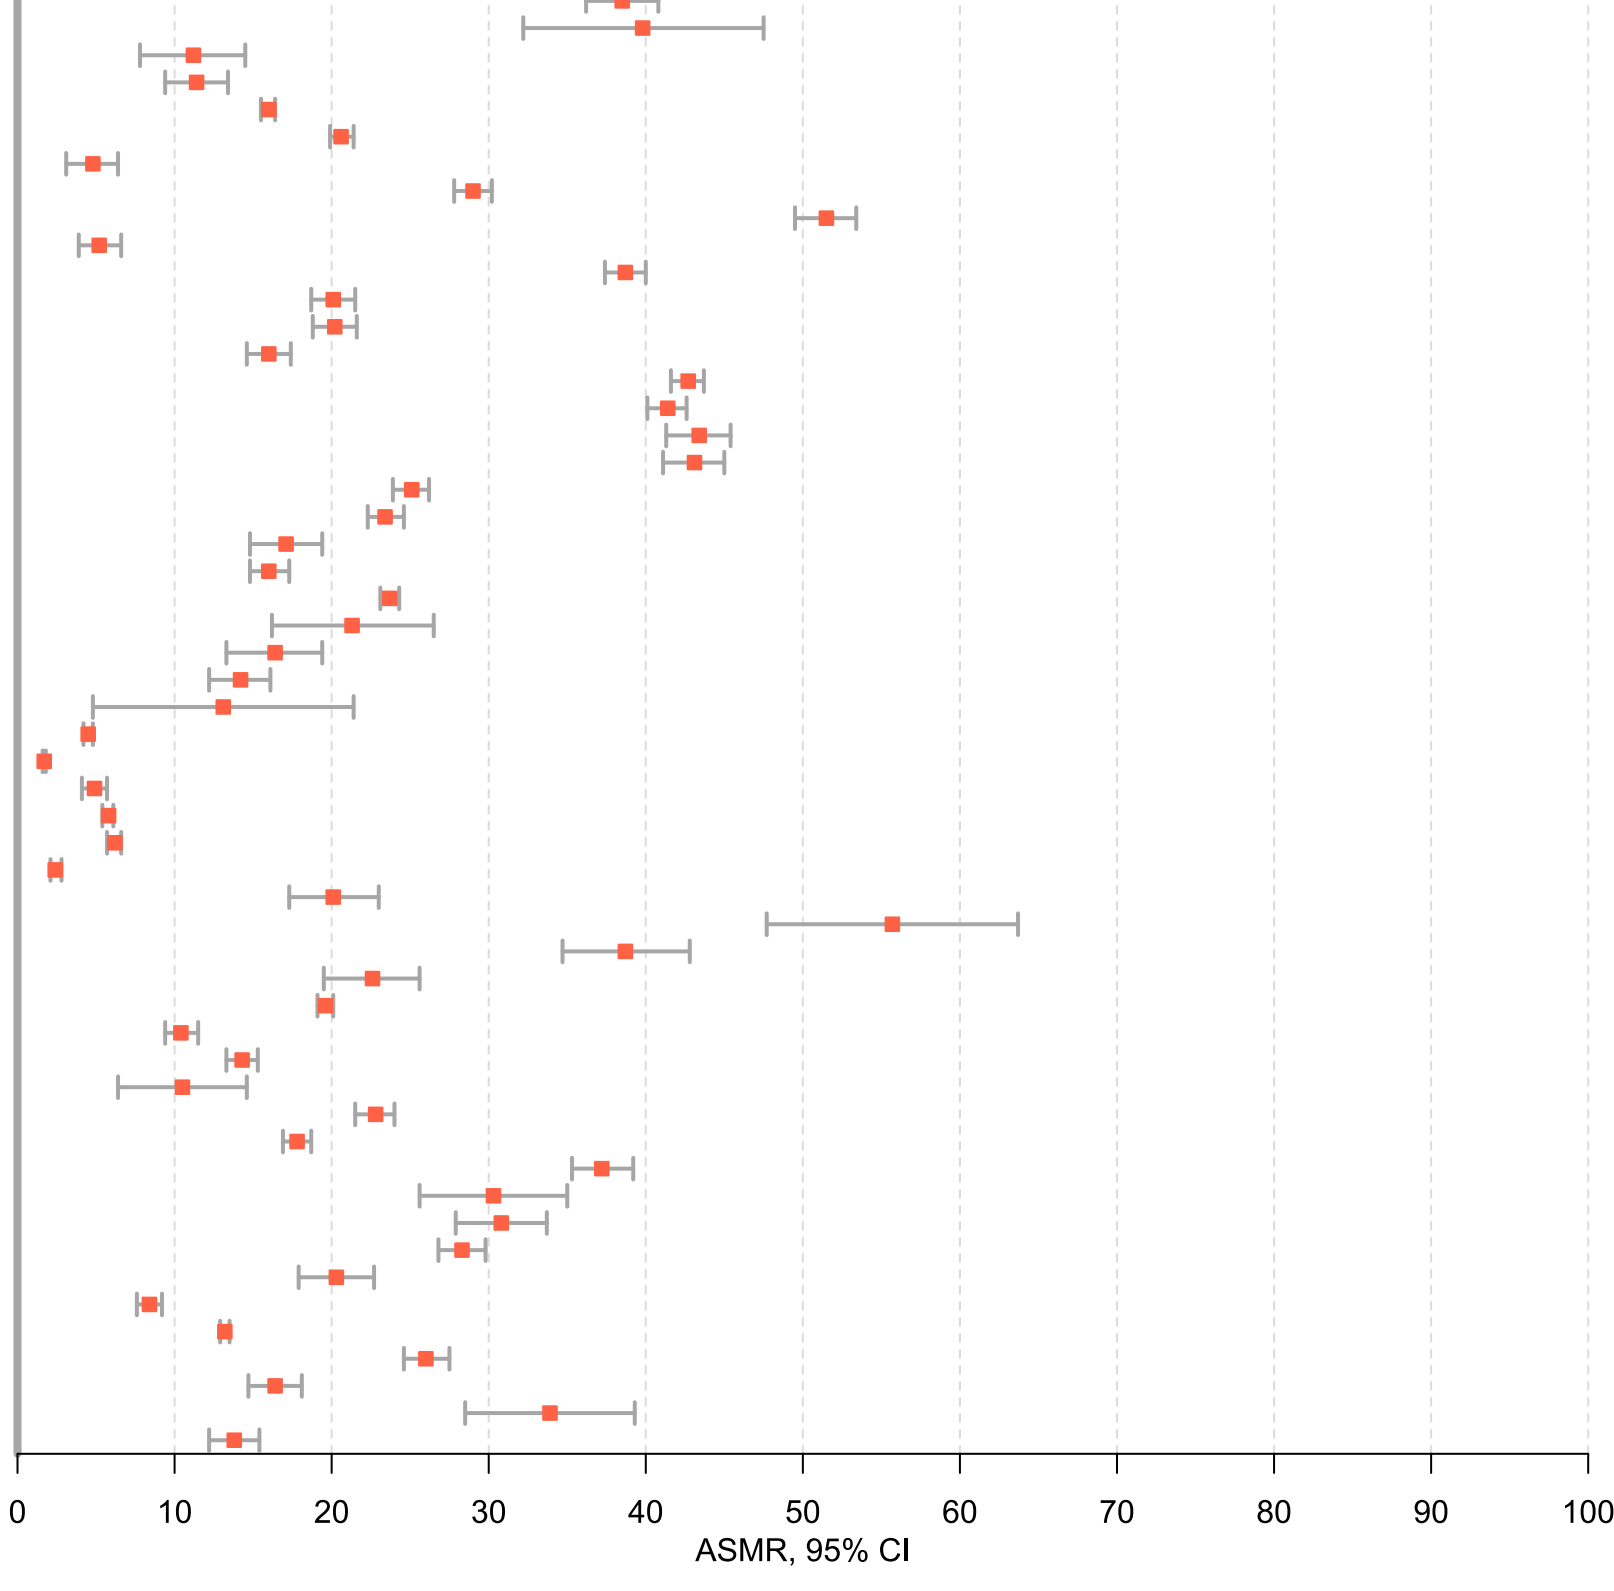

### Americas and Oceania

- Bahamas
- Barbados
- Cuba
- Dominican Republic
- Guadeloupe
- Haiti
- Jamaica
- Martinique
- Puerto Rico
- Saint Lucia
- Trinidad and Tobago
- Belize
- Costa Rica
- El Salvador
- Guatemala
- Honduras
- Mexico
- Nicaragua
- Panama
- Argentina
- Bolivia
- Brazil
- Chile
- Colombia
- Ecuador
- French Guyana
- Guyana
- Paraguay
- Peru
- Suriname
- Uruguay
- Venezuela
- Canada
- United States of America
- Australia
- New Zealand
- Fiji
- New Caledonia
- Papua New Guinea
- Solomon Islands
- Vanuatu
- Guam
- French Polynesia
- Samoa

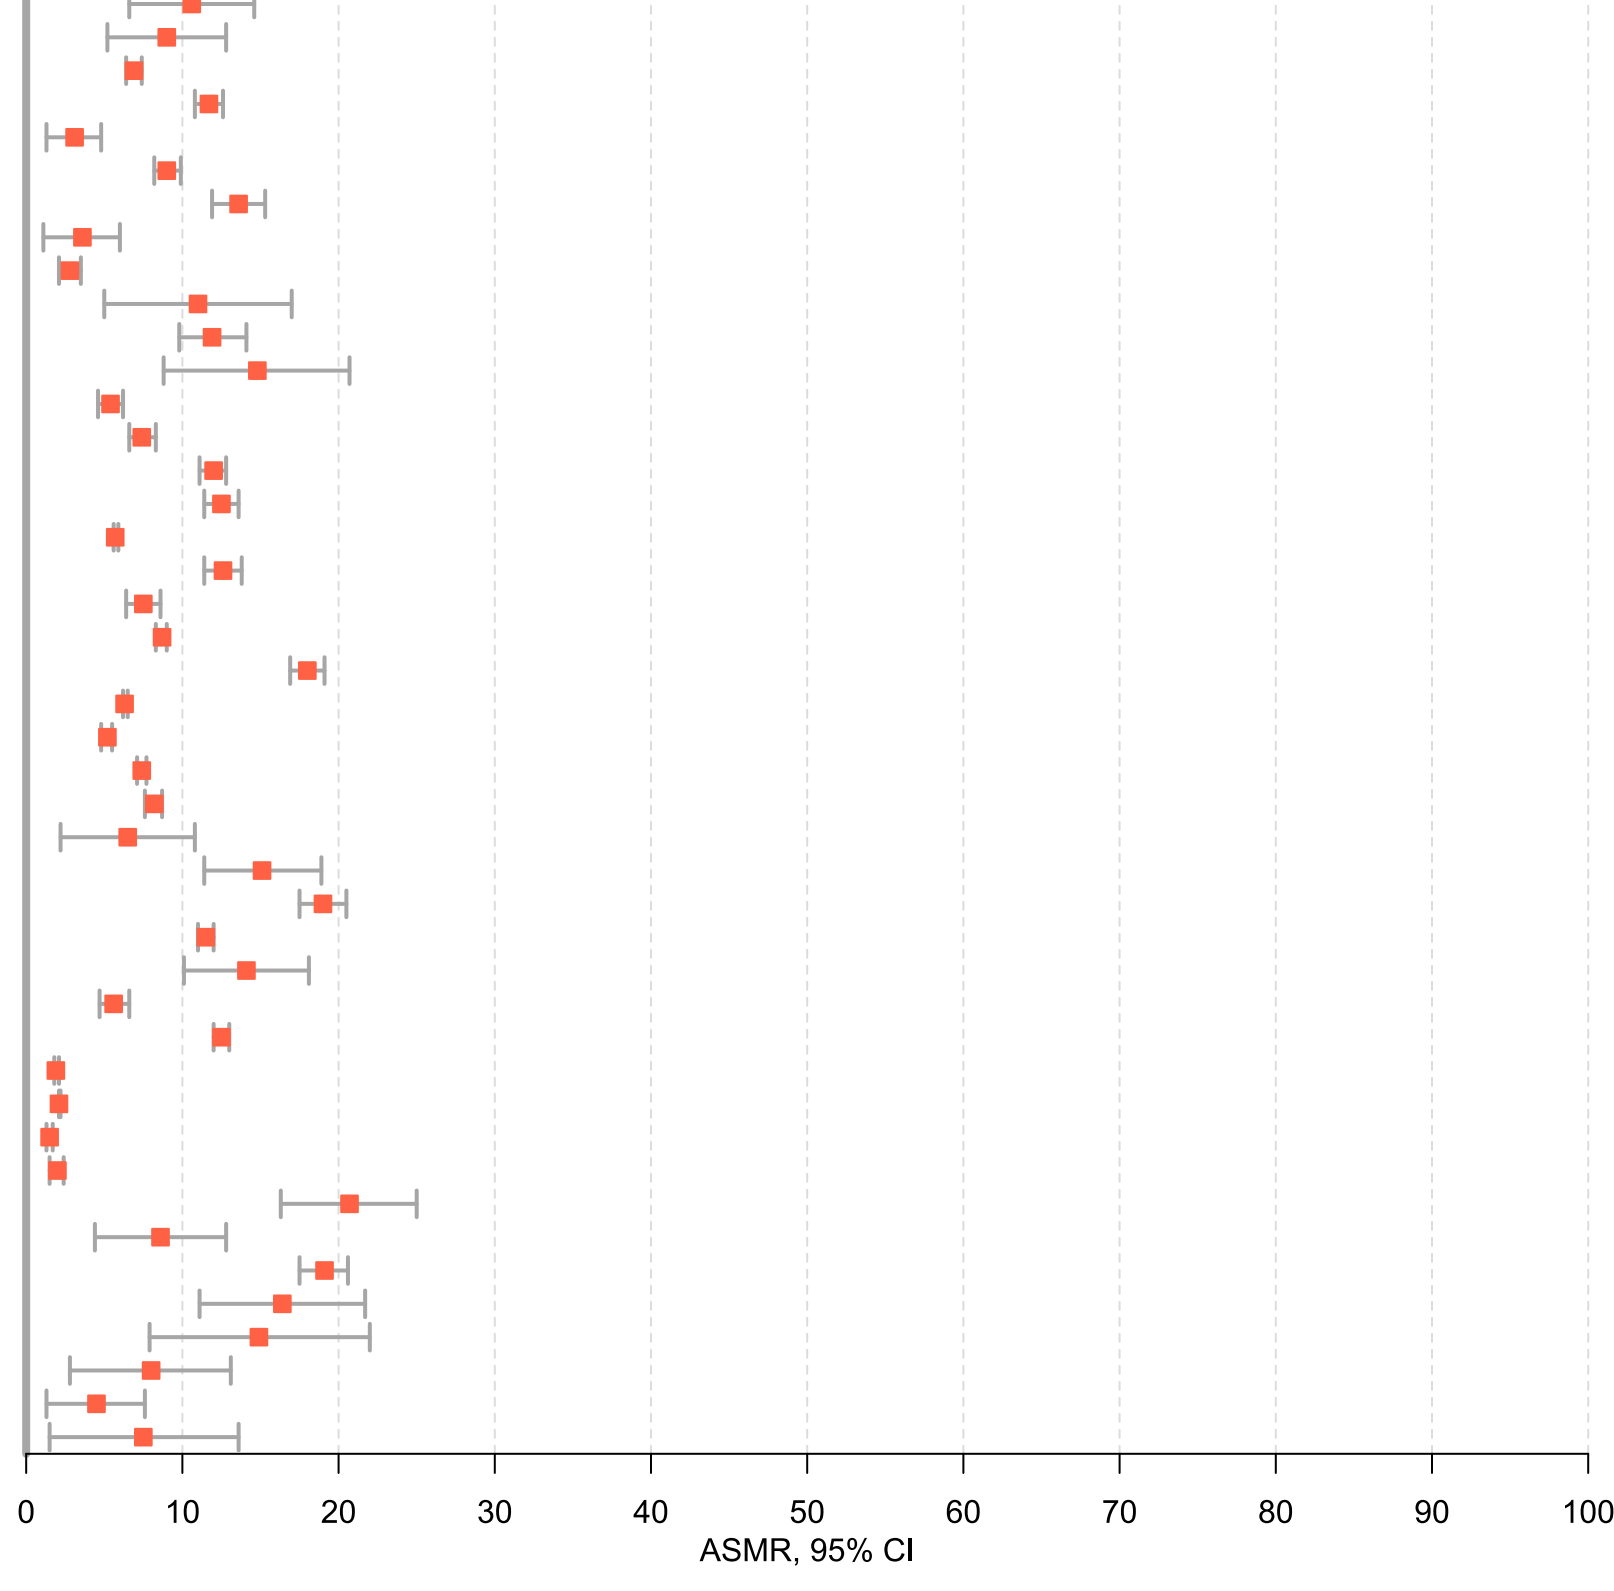

Page 4

### Asia

- China
- Democratic People Republic of Korea
- Japan
- Mongolia
- Republic of Korea
- Afghanistan
- Bangladesh
- Bhutan
- India
- Islamic Republic of Iran
- Kazakhstan
- Kyrgyzstan
- Maldives
- Nepal
- Pakistan
- Sri Lanka
- Tajikistan
- Turkmenistan
- Uzbekistan
- Brunei Darussalam
- Cambodia
- Indonesia
- Lao People Democratic Republic
- Malaysia
- Myanmar
- Philippines
- Singapore
- Thailand
- Timor-Leste
- Viet Nam
- Armenia
- Azerbaijan
- Bahrain
- Georgia
- Iraq
- Israel
- Jordan
- Kuwait
- Lebanon
- Oman
- Palestine
- Qatar
- Saudi Arabia
- Syrian Arab Republic
- Turkey
- United Arab Emirates
- Yemen

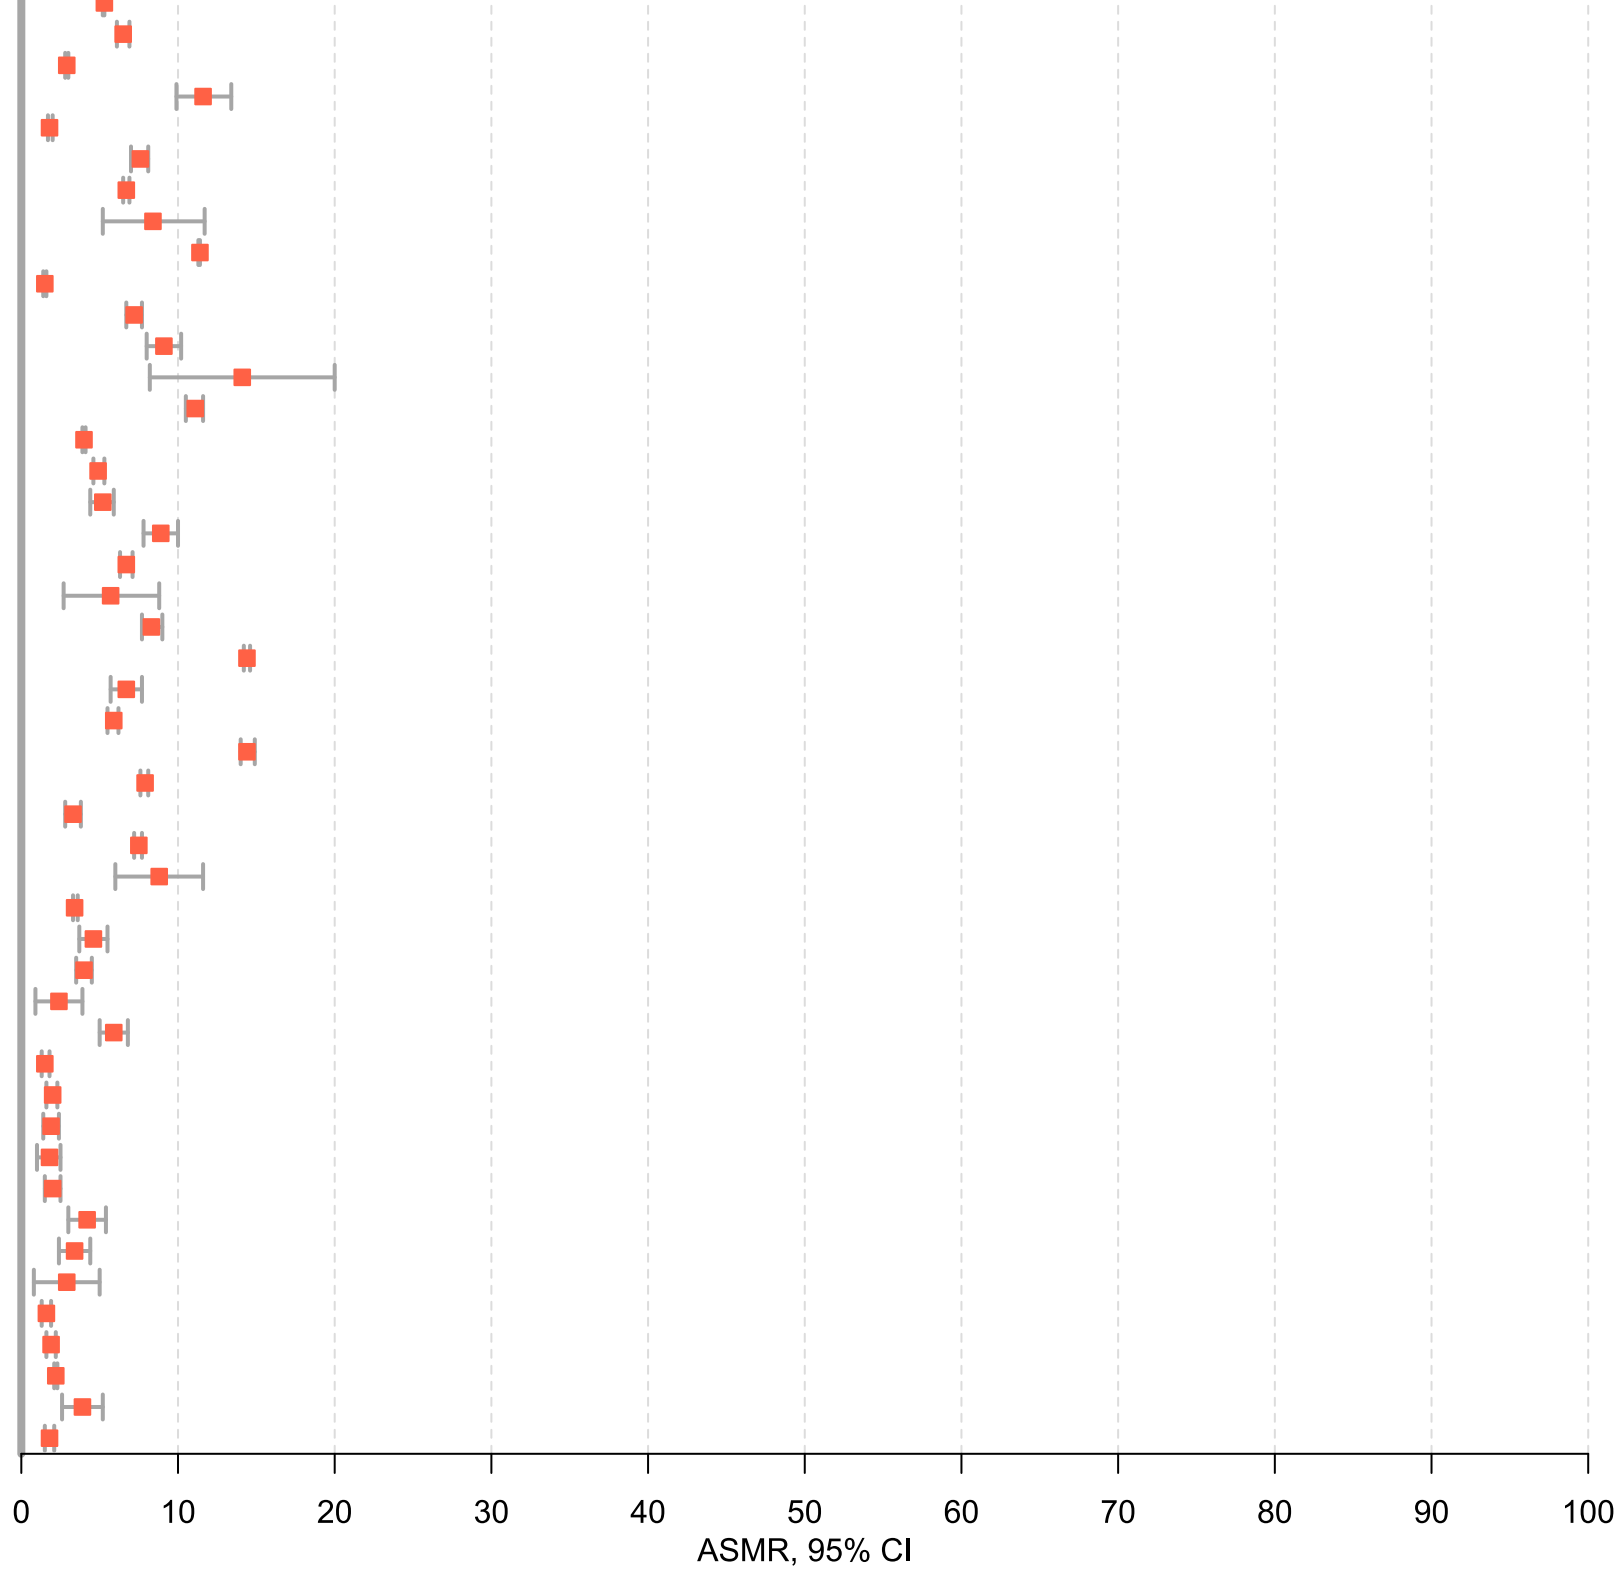

### Europe

- Belarus
- Bulgaria
- Czechia
- Hungary
- Moldova
- Poland
- Romania
- Russian Federation
- Slovakia
- Ukraine
- Denmark
- Estonia
- Finland
- Iceland
- Ireland
- Latvia
- Lithuania
- Norway
- Sweden
- United Kingdom
- Albania
- Bosnia Herzegovina
- Croatia
- Cyprus
- Greece
- Italy
- Malta
- Montenegro
- North Macedonia
- Portugal
- Serbia
- Slovenia
- Spain
- Austria
- Belgium
- France (metropolitan)
- Germany
- Luxembourg
- Netherlands
- Switzerland

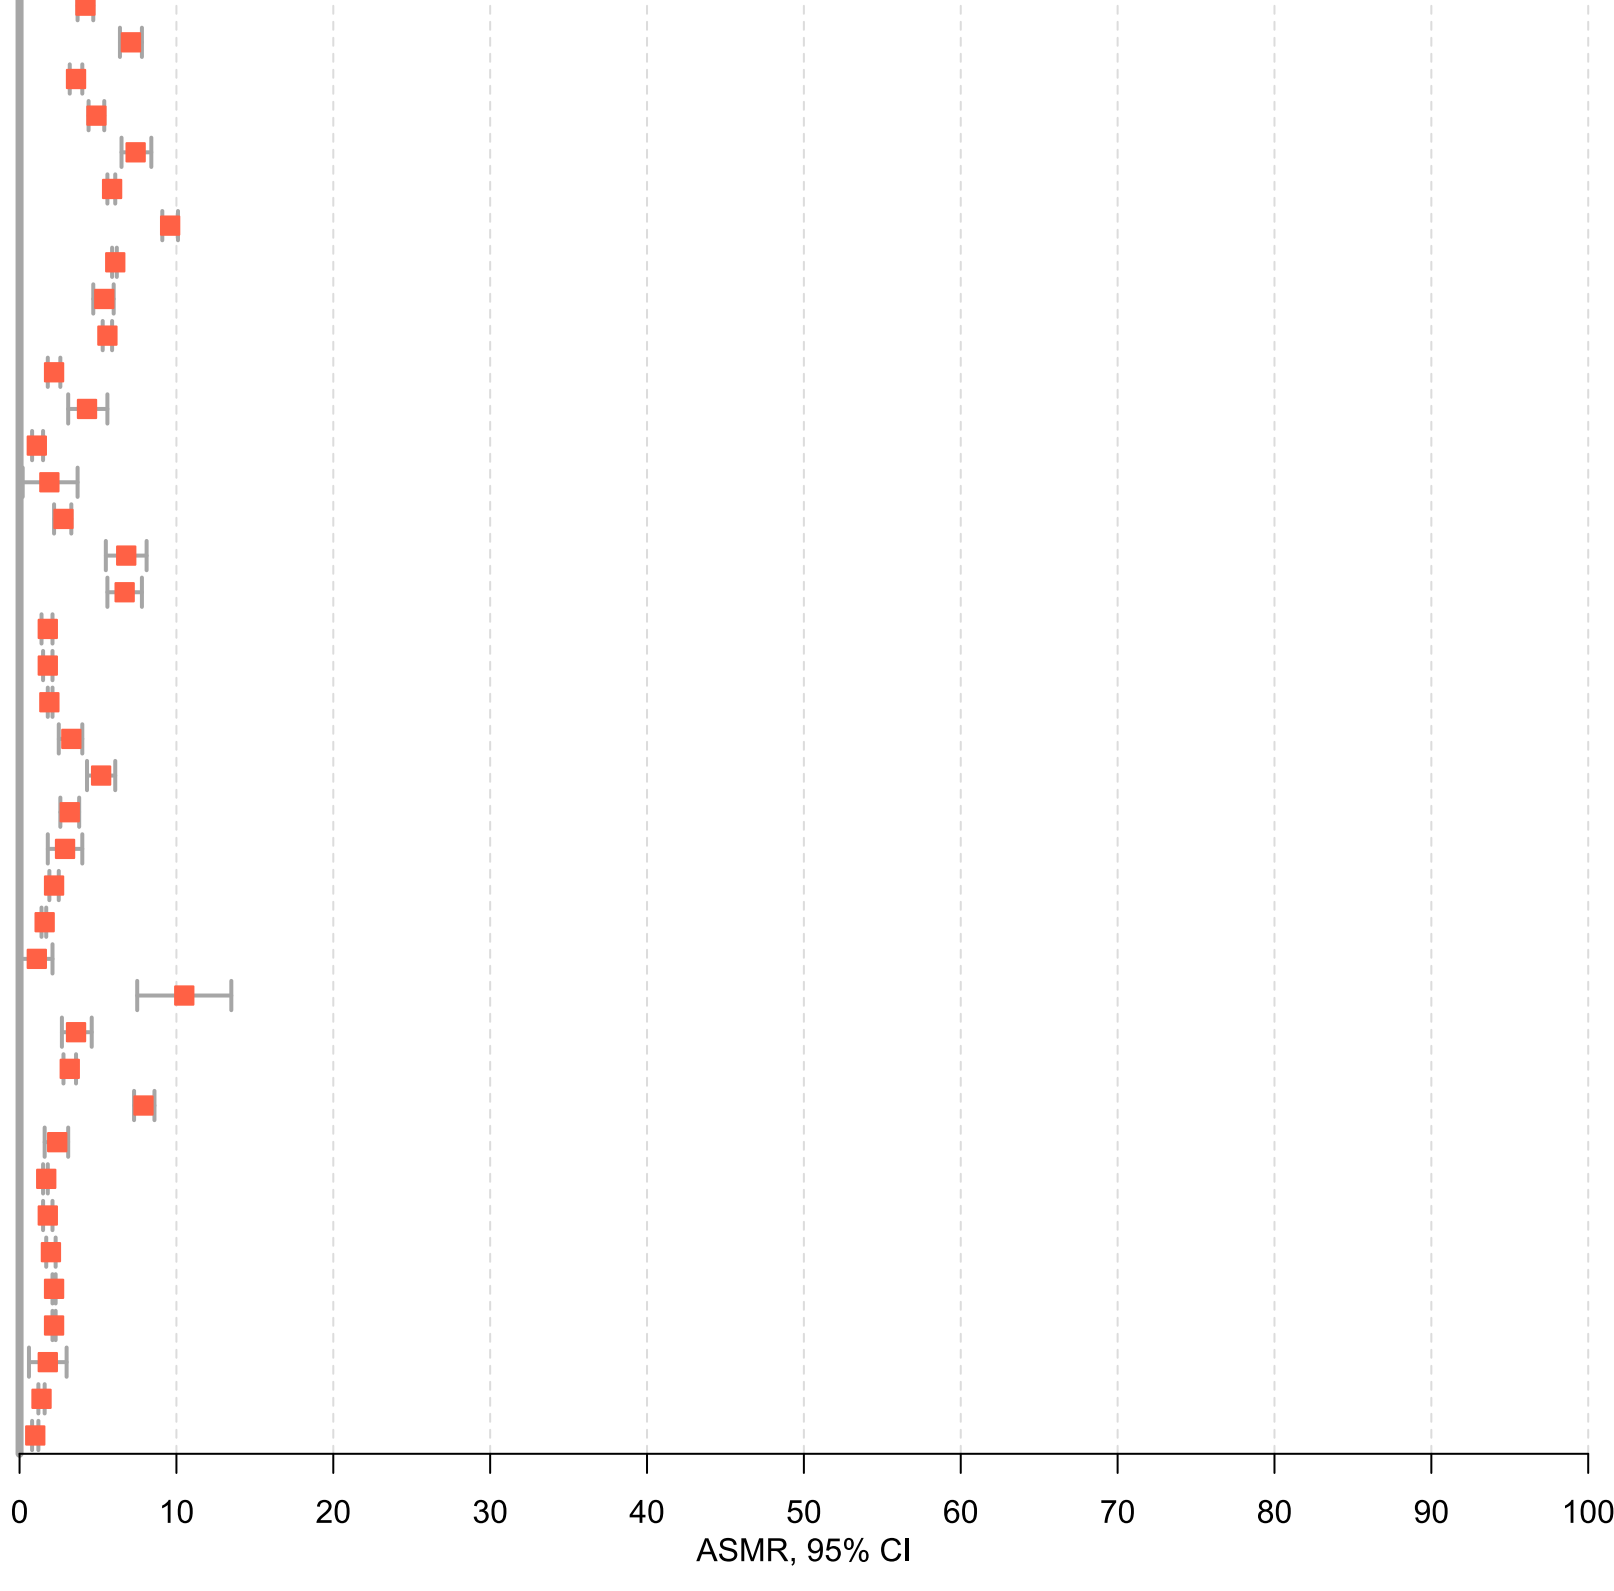

Page 5

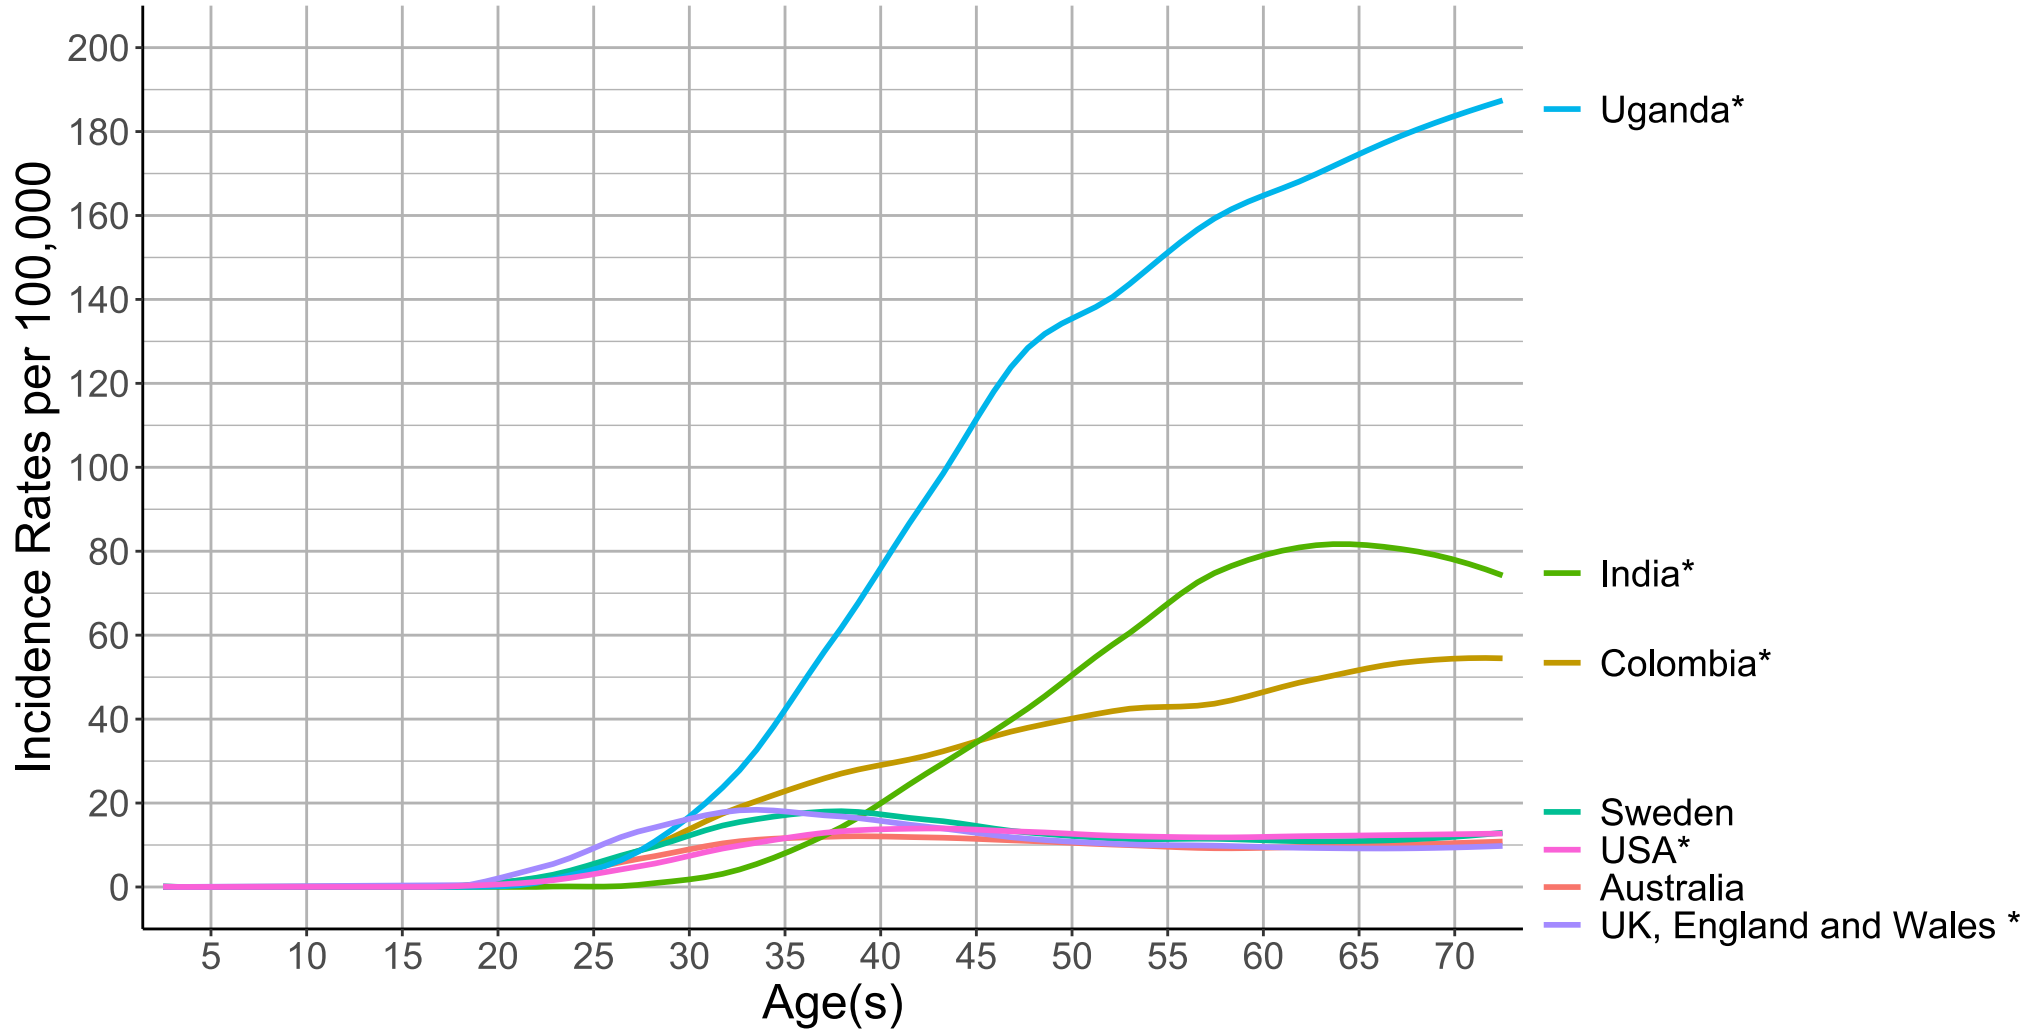

\* Subnational data

## Appendix (Table I – IV)

Appendix Table I: Availability of data used in trend estimate for individual countries reporting population-based incidence data in CI5plus during the studied period 1988 – 2017

| Region                       | Country               | Data used period (in years) |
|------------------------------|-----------------------|-----------------------------|
| Latin America                | Brazil                | 1993 – 2012                 |
|                              | Chile                 | 1997 – 2012                 |
|                              | Colombia              | 1988 – 2012                 |
|                              | Costa Rica            | 1988 – 2011                 |
|                              | Ecuador               | 1988 – 2012                 |
| Asia                         | China                 | 1988 – 2012                 |
|                              | Thailand              | 1993 – 2012                 |
|                              | India                 | 1988 – 2012                 |
|                              | Japan                 | 1988 – 2010                 |
|                              | Republic of Korea     | 1999 – 2012                 |
| Central and Eastern Europe   | Belarus               | 1988 – 2012                 |
|                              | Bulgaria              | 1993 – 2013                 |
|                              | Croatia               | 1988 – 2012                 |
|                              | Czechia               | 1988 – 2013                 |
|                              | Latvia                | 1988 – 2012                 |
|                              | Lithuania             | 1988 – 2012                 |
|                              | Poland                | 1998 – 2012                 |
|                              | Slovakia              | 1988 – 2010                 |
|                              | Slovenia              | 1988 – 2012                 |
|                              | Ukraine               | 2003 – 2015                 |
| Northern America and Oceania | Australia             | 1988 – 2016                 |
|                              | Canada                | 1988 – 2012                 |
|                              | New Zealand           | 1988 – 2012                 |
|                              | USA                   | 1988 – 2016                 |
| Northern Europe              | Denmark               | 1988 – 2016                 |
|                              | Iceland               | 1988 – 2016                 |
|                              | Norway                | 1988 – 2016                 |
|                              | Sweden                | 1988 – 2016                 |
|                              | UK, England and Wales | 1988 – 2017                 |
|                              | UK, Northern Ireland  | 1993 – 2013                 |
| Western and Southern Europe  | France                | 1988 – 2012                 |
|                              | Germany               | 1998 – 2012                 |
|                              | Italy                 | 1988 – 2012                 |
|                              | Malta                 | 1992 – 2013                 |
|                              | Spain                 | 1993 – 2010                 |
|                              | Switzerland           | 1998 – 2012                 |
|                              | The Netherlands       | 1989 – 2013                 |

Appendix Table II: Estimated annual percentage change (EAPC) in age-standardized rates (ASR) with 95% confidence interval (CI) of cervical cancer incidence in last 10 years available by countries reporting population-based incidence data in CI5plus

| <b>Country</b>                     | <b>EAPC<br/>(%)</b> | <b>EAPC,<br/>lower CI<br/>(%)</b> | <b>EAPC,<br/>upper CI<br/>(%)</b> |
|------------------------------------|---------------------|-----------------------------------|-----------------------------------|
| Latvia (2003-2012)                 | 4.3                 | -1.7                              | 10.6                              |
| Japan (2001-2010)*                 | 3.4                 | -4.0                              | 11.4                              |
| Ireland (2003-2012)                | 3.1                 | -3.7                              | 10.4                              |
| Sweden (2007-2016)                 | 2.9                 | -4.8                              | 11.3                              |
| Norway (2007-2016)                 | 2.3                 | -4.5                              | 9.5                               |
| UK, Northern Ireland (2004-2013)   | 2.1                 | -5.0                              | 9.6                               |
| Estonia (2003-2012)                | 1.6                 | -3.6                              | 7.0                               |
| China (2003-2012)*                 | 1.5                 | -7.0                              | 10.7                              |
| Belarus (2003-2012)                | 1.1                 | -4.8                              | 7.5                               |
| Germany (2003-2012)*               | 1.1                 | -6.1                              | 8.8                               |
| Iceland (2007-2016)                | 0.9                 | -6.3                              | 8.6                               |
| The Netherlands (2004-2013)        | 0.6                 | -7.8                              | 9.7                               |
| Slovakia (2001-2010)               | 0.4                 | -4.9                              | 6.1                               |
| Ukraine (2006-2015)                | 0.3                 | -5.1                              | 6.0                               |
| Italy (2003-2012)*                 | 0.2                 | -8.9                              | 10.2                              |
| Croatia (2003-2012)                | 0.2                 | -6.2                              | 7.1                               |
| Australia (2007-2016)              | 0.2                 | -8.6                              | 9.8                               |
| UK, England and Wales (2008-2017)* | 0.2                 | -7.4                              | 8.4                               |
| Switzerland (2003-2012)*           | 0.1                 | -10.2                             | 11.7                              |
| Uganda (2006-2015)*                | 0.0                 | -2.9                              | 3.0                               |
| Turkey (2003-2012)*                | -0.2                | -9.1                              | 9.5                               |
| Spain (2001-2010)*                 | -0.4                | -8.6                              | 8.7                               |
| Denmark (2007-2016)                | -0.4                | -6.9                              | 6.6                               |
| Israel (2003-2012)                 | -0.4                | -9.2                              | 9.2                               |
| Bulgaria (2004-2013)               | -0.5                | -5.2                              | 4.5                               |
| Canada (2003-2012)*                | -0.5                | -8.7                              | 8.5                               |
| New Zealand (2003-2012)            | -0.9                | -9.2                              | 8.3                               |
| Ecuador (2003-2012)*               | -1.2                | -6.0                              | 3.9                               |
| Lithuania (2003-2012)              | -1.2                | -5.8                              | 3.6                               |
| USA (2007-2016)*                   | -1.2                | -9.9                              | 8.2                               |
| France (2003-2012)*                | -1.8                | -9.7                              | 6.7                               |
| Czechia (2004-2013)                | -2.3                | -8.0                              | 3.7                               |
| Malta (2004-2013)                  | -2.4                | -12.4                             | 8.8                               |
| Costa Rica (2002-2011)             | -2.9                | -8.4                              | 2.9                               |
| Republic of Korea (2003-2012)      | -3.6                | -9.5                              | 2.7                               |
| Poland (2003-2012)*                | -3.7                | -9.9                              | 2.8                               |
| India (2003-2012)*                 | -3.8                | -8.4                              | 1.1                               |
| Thailand (2003-2012)*              | -4.8                | -9.9                              | 0.6                               |
| Colombia (2003-2012)*              | -5.6                | -10.3                             | -0.7                              |
| Chile (2003-2012)*                 | -6.3                | -11.5                             | -0.9                              |
| Kuwait: Kuwaiti (2003-2012)        | -6.8                | -17.1                             | 4.8                               |
| Slovenia (2003-2012)               | -7.1                | -13.1                             | -0.6                              |
| Brazil (2003-2012)*                | -7.9                | -12.5                             | -3.0                              |

\*subnational data

Appendix Table III: Estimated number of cervical cancer cases with uncertainty intervals (UIs) by country (sorted by decreasing number of cases)

| <b>Population</b>                 | <b>Number of cases</b> | <b>Uncertainty interval</b> |
|-----------------------------------|------------------------|-----------------------------|
| World                             | 604127                 | [582031.0-627062.0]         |
| India                             | 123907                 | [119237.0-128760.0]         |
| China                             | 109741                 | [106978.0-112576.0]         |
| Indonesia                         | 36633                  | [33763.5-39746.4]           |
| Brazil                            | 17743                  | [16977.0-18543.6]           |
| Russian Federation                | 15308                  | [14910.1-15716.5]           |
| United States of America          | 13545                  | [13118.7-13985.2]           |
| Japan                             | 12785                  | [11424.7-14307.2]           |
| Nigeria                           | 12075                  | [10035.7-14528.6]           |
| South Africa                      | 10702                  | [10390.6-11022.8]           |
| Tanzania, United Republic of      | 10241                  | [9352.0-11214.5]            |
| Mexico                            | 9439                   | [8942.8-9962.7]             |
| Thailand                          | 9158                   | [8563.1-9794.2]             |
| Bangladesh                        | 8268                   | [6083.7-11236.5]            |
| Philippines                       | 7897                   | [7306.2-8535.6]             |
| Congo, Democratic Republic of     | 7772                   | [5029.7-12009.4]            |
| Ethiopia                          | 7445                   | [6425.3-8626.5]             |
| Myanmar                           | 7129                   | [4069.1-12489.9]            |
| Uganda                            | 6959                   | [6312.5-7671.7]             |
| Mozambique                        | 5325                   | [4630.3-6124.0]             |
| Kenya                             | 5236                   | [4591.6-5970.9]             |
| Pakistan                          | 5008                   | [3805.2-6591.0]             |
| Ukraine                           | 4756                   | [4386.8-5156.3]             |
| Colombia                          | 4742                   | [4311.2-5215.8]             |
| Germany                           | 4666                   | [4366.3-4986.3]             |
| Argentina                         | 4583                   | [4133.9-5080.9]             |
| Peru                              | 4270                   | [3779.3-4824.4]             |
| Malawi                            | 4145                   | [3476.4-4942.2]             |
| Viet Nam                          | 4132                   | [3786.7-4508.8]             |
| Poland                            | 3862                   | [3582.6-4163.2]             |
| United Kingdom                    | 3791                   | [3562.9-4033.7]             |
| Madagascar                        | 3763                   | [2193.4-6455.9]             |
| Venezuela, Bolivarian Republic of | 3709                   | [3220.3-4271.9]             |
| Romania                           | 3380                   | [3019.0-3784.1]             |
| France                            | 3379                   | [2994.8-3812.5]             |
| Korea, Republic of                | 3218                   | [3061.9-3382.1]             |
| Angola                            | 3195                   | [2660.0-3837.6]             |
| Zambia                            | 3161                   | [2778.7-3595.9]             |
| Italy                             | 3152                   | [2648.0-3751.9]             |
| Zimbabwe                          | 3043                   | [2747.7-3370.0]             |
| Ghana                             | 2797                   | [2174.1-3598.3]             |
| Cameroon                          | 2770                   | [2237.8-3428.8]             |
| Turkey                            | 2532                   | [2042.5-3138.9]             |



|                                 |      |                 |
|---------------------------------|------|-----------------|
| Nepal                           | 2244 | [1926.1-2614.3] |
| Morocco                         | 2165 | [1917.0-2445.0] |
| Guinea                          | 2068 | [1750.4-2443.3] |
| Côte d'Ivoire                   | 2067 | [1800.2-2373.3] |
| Bolivia, Plurinational State of | 1985 | [1757.8-2241.6] |
| Korea, Democratic Republic of   | 1970 | [1684.5-2303.9] |
| Spain                           | 1957 | [1697.1-2256.8] |
| Senegal                         | 1937 | [856.2-4382.0]  |
| Mali                            | 1934 | [1648.8-2268.5] |
| Uzbekistan                      | 1887 | [1616.8-2202.3] |
| Kazakhstan                      | 1777 | [1677.0-1882.9] |
| Malaysia                        | 1740 | [1616.6-1872.9] |
| Algeria                         | 1663 | [1437.7-1923.6] |
| Burundi                         | 1581 | [921.5-2712.4]  |
| Guatemala                       | 1555 | [1382.0-1749.6] |
| Ecuador                         | 1534 | [1332.6-1765.9] |
| Chile                           | 1503 | [1271.0-1777.4] |
| Canada                          | 1422 | [1214.8-1664.5] |
| Sri Lanka                       | 1407 | [1314.8-1505.7] |
| Egypt                           | 1320 | [1013.5-1719.1] |
| Hungary                         | 1251 | [1025.9-1525.5] |
| Rwanda                          | 1229 | [929.5-1625.1]  |
| Sudan                           | 1227 | [1124.4-1339.0] |
| Serbia                          | 1205 | [1024.7-1417.0] |
| Afghanistan                     | 1200 | [883.0-1630.8]  |
| Cuba                            | 1187 | [1011.3-1393.3] |
| Paraguay                        | 1175 | [942.8-1464.3]  |
| Cambodia                        | 1135 | [647.8-1988.5]  |
| Burkina Faso                    | 1132 | [636.9-2012.1]  |
| Papua New Guinea                | 1077 | [310.7-3733.3]  |
| Dominican Republic              | 1074 | [959.4-1202.2]  |
| Iran, Islamic Republic of       | 1056 | [956.8-1165.4]  |
| Somalia                         | 1055 | [614.9-1810.0]  |
| Bulgaria                        | 1009 | [863.5-1179.0]  |
| Australia                       | 920  | [834.2-1014.6]  |
| Chad                            | 890  | [576.0-1375.2]  |
| Portugal                        | 865  | [705.9-1060.0]  |
| Honduras                        | 858  | [668.5-1101.2]  |
| Belarus                         | 835  | [777.5-896.8]   |
| The Netherlands                 | 773  | [670.4-891.3]   |
| Czechia                         | 769  | [654.5-903.5]   |
| Nicaragua                       | 719  | [593.0-871.8]   |
| South Sudan                     | 711  | [414.4-1219.8]  |
| Slovakia                        | 698  | [638.6-762.9]   |
| Greece                          | 697  | [530.0-916.6]   |
| Liberia                         | 656  | [290.0-1484.0]  |
| Sweden                          | 656  | [585.4-735.1]   |
| Belgium                         | 639  | [562.4-726.1]   |

|                                     |     |                |
|-------------------------------------|-----|----------------|
| Niger                               | 622 | [311.8-1240.9] |
| Haiti                               | 588 | [501.7-689.1]  |
| Benin                               | 560 | [391.4-801.2]  |
| Lesotho                             | 541 | [381.3-767.7]  |
| El Salvador                         | 530 | [432.6-649.3]  |
| Sierra Leone                        | 504 | [468.5-542.2]  |
| Kyrgyzstan                          | 498 | [392.0-632.7]  |
| Republic of Moldova                 | 480 | [375.3-614.0]  |
| Turkmenistan                        | 461 | [385.7-551.0]  |
| Togo                                | 455 | [320.7-645.6]  |
| Mauritania                          | 428 | [189.2-968.2]  |
| Azerbaijan                          | 425 | [374.5-482.3]  |
| Lithuania                           | 412 | [351.2-483.3]  |
| Norway                              | 397 | [336.3-468.6]  |
| Jamaica                             | 386 | [322.7-461.7]  |
| Austria                             | 385 | [298.5-496.5]  |
| Denmark                             | 384 | [322.7-456.9]  |
| Namibia                             | 375 | [332.5-422.9]  |
| Botswana                            | 374 | [281.7-496.6]  |
| Lao People's Democratic<br>Republic | 371 | [211.8-650.0]  |
| Costa Rica                          | 367 | [258.9-520.3]  |
| Saudi Arabia                        | 358 | [190.9-671.4]  |
| Congo, Republic of                  | 350 | [270.0-453.7]  |
| Panama                              | 346 | [270.1-443.2]  |
| Tunisia                             | 342 | [263.5-443.9]  |
| Ireland                             | 342 | [252.9-462.6]  |
| Eswatini                            | 341 | [302.8-384.0]  |
| Croatia                             | 336 | [271.9-415.2]  |
| Mongolia                            | 334 | [291.5-382.8]  |
| Georgia                             | 327 | [305.8-349.6]  |
| Tajikistan                          | 322 | [262.7-394.7]  |
| Bosnia and Herzegovina              | 312 | [253.1-384.6]  |
| Singapore                           | 309 | [254.8-374.8]  |
| Central African Republic            | 297 | [192.2-458.9]  |
| The Republic of the Gambia          | 286 | [213.4-383.4]  |
| Iraq                                | 286 | [248.5-329.1]  |
| Uruguay                             | 273 | [211.1-353.1]  |
| Latvia                              | 267 | [197.5-361.0]  |
| Israel                              | 245 | [194.0-309.3]  |
| Libya                               | 240 | [165.5-348.0]  |
| Guinea-Bissau                       | 239 | [105.6-540.7]  |
| Switzerland                         | 236 | [166.4-334.7]  |
| Gabon                               | 236 | [163.9-339.9]  |
| Yemen                               | 225 | [102.7-493.0]  |
| Syrian Arab Republic                | 215 | [42.7-1082.4]  |
| Trinidad and Tobago                 | 202 | [154.9-263.5]  |
| Estonia                             | 196 | [145.7-263.7]  |

|                          |     |               |
|--------------------------|-----|---------------|
| Finland                  | 185 | [133.7-256.1] |
| Eritrea                  | 178 | [103.8-305.4] |
| Armenia                  | 178 | [166.5-190.3] |
| New Zealand              | 174 | [123.6-244.9] |
| Comoros                  | 167 | [97.3-286.5]  |
| Puerto Rico              | 156 | [97.1-250.7]  |
| Fiji                     | 136 | [111.8-165.4] |
| Albania                  | 133 | [92.4-191.4]  |
| Lebanon                  | 124 | [99.5-154.6]  |
| Mauritius                | 123 | [82.0-184.6]  |
| United Arab Emirates     | 123 | [87.6-172.8]  |
| Equatorial Guinea        | 123 | [79.6-190.1]  |
| Guyana                   | 121 | [81.0-180.6]  |
| Jordan                   | 115 | [84.0-157.4]  |
| Montenegro               | 113 | [90.9-140.5]  |
| North Macedonia          | 113 | [78.8-162.0]  |
| Slovenia                 | 104 | [65.1-166.3]  |
| Oman                     | 88  | [59.1-131.1]  |
| Suriname                 | 78  | [51.4-118.3]  |
| France, La Réunion       | 70  | [52.5-93.2]   |
| Timor-Leste              | 65  | [37.1-113.9]  |
| Solomon Islands          | 65  | [18.8-225.3]  |
| Gaza Strip and West Bank | 64  | [12.7-322.2]  |
| Djibouti                 | 63  | [36.7-108.1]  |
| Brunei Darussalam        | 54  | [36.2-80.5]   |
| Kuwait                   | 53  | [36.8-76.3]   |
| Bhutan                   | 47  | [41.7-52.9]   |
| Cabo Verde               | 46  | [26.4-80.1]   |
| Maldives                 | 46  | [33.8-62.5]   |
| Cyprus                   | 46  | [30.8-68.7]   |
| Barbados                 | 39  | [22.6-67.4]   |
| Bahamas                  | 39  | [22.7-67.0]   |
| Belize                   | 34  | [19.5-59.2]   |
| France, New Caledonia    | 30  | [18.5-48.8]   |
| France, Guadeloupe       | 29  | [19.5-43.1]   |
| France, Martinique       | 26  | [17.0-39.8]   |
| Luxembourg               | 24  | [10.1-57.1]   |
| Qatar                    | 23  | [6.1-86.6]    |
| Vanuatu                  | 22  | [7.2-67.2]    |
| Bahrain                  | 21  | [11.6-37.9]   |
| Saint Lucia              | 20  | [9.3-43.1]    |
| Guam                     | 19  | [11.9-30.2]   |
| French Guiana            | 18  | [11.1-29.1]   |
| French Polynesia         | 16  | [8.6-29.7]    |
| Iceland                  | 16  | [9.6-26.6]    |
| Sao Tome and Principe    | 13  | [12.5-13.6]   |
| Malta                    | 13  | [6.6-25.8]    |
| Samoa                    | 10  | [5.0-19.9]    |

Appendix Table IV: Estimated number of cervical cancer deaths with uncertainty intervals (UIs) by country (sorted by decreasing number of death cases)

| <b>Population</b>                 | <b>Number of deaths</b> | <b>Uncertainty interval</b> |
|-----------------------------------|-------------------------|-----------------------------|
| World                             | 341831                  | [324231.0-360386.0]         |
| India                             | 77348                   | [74245.5-80580.2]           |
| China                             | 59060                   | [56090.0-62187.3]           |
| Indonesia                         | 21003                   | [19331.7-22818.7]           |
| Brazil                            | 9168                    | [8852.8-9494.4]             |
| Nigeria                           | 7968                    | [6468.9-9814.5]             |
| Russian Federation                | 7550                    | [7313.9-7793.7]             |
| Tanzania, United Republic of      | 6525                    | [5857.9-7268.1]             |
| South Africa                      | 5870                    | [5492.2-6273.8]             |
| United States of America          | 5706                    | [5381.5-6050.0]             |
| Congo, Democratic Republic of     | 5548                    | [3678.3-8368.1]             |
| Ethiopia                          | 5338                    | [4497.6-6335.5]             |
| Bangladesh                        | 4971                    | [3736.6-6613.2]             |
| Thailand                          | 4705                    | [4337.8-5103.3]             |
| Uganda                            | 4607                    | [4113.1-5160.3]             |
| Myanmar                           | 4497                    | [2802.1-7217.1]             |
| Mexico                            | 4335                    | [4141.9-4537.1]             |
| Japan                             | 4213                    | [4016.8-4418.8]             |
| Philippines                       | 4052                    | [3737.3-4393.2]             |
| Mozambique                        | 3850                    | [3272.1-4530.0]             |
| Kenya                             | 3211                    | [2747.0-3753.3]             |
| Pakistan                          | 3197                    | [2403.1-4253.1]             |
| Malawi                            | 2905                    | [2392.7-3527.0]             |
| Argentina                         | 2553                    | [2350.5-2772.9]             |
| Colombia                          | 2490                    | [2316.3-2676.7]             |
| Madagascar                        | 2460                    | [1425.3-4245.9]             |
| Peru                              | 2288                    | [2079.2-2517.7]             |
| Viet Nam                          | 2223                    | [2019.4-2447.1]             |
| Poland                            | 2137                    | [2012.2-2269.5]             |
| Venezuela, Bolivarian Republic of | 2129                    | [1910.2-2372.8]             |
| Ukraine                           | 2089                    | [1938.8-2250.9]             |
| Germany                           | 2075                    | [1939.0-2220.5]             |
| Zimbabwe                          | 1976                    | [1752.6-2227.9]             |
| Angola                            | 1949                    | [1602.6-2370.2]             |
| Zambia                            | 1904                    | [1633.6-2219.1]             |
| Romania                           | 1805                    | [1653.6-1970.2]             |
| Cameroon                          | 1787                    | [1421.4-2246.6]             |
| Ghana                             | 1699                    | [1282.9-2250.0]             |
| Nepal                             | 1493                    | [1251.4-1781.2]             |
| Guinea                            | 1463                    | [1232.3-1736.9]             |
| France                            | 1452                    | [1320.9-1596.1]             |
| Côte d'Ivoire                     | 1417                    | [1208.5-1661.4]             |
| Mali                              | 1406                    | [1172.4-1686.2]             |
| Senegal                           | 1312                    | [612.4-2810.8]              |
| Turkey                            | 1245                    | [1101.3-1407.5]             |
| Morocco                           | 1199                    | [1045.6-1374.9]             |

|                                 |      |                 |
|---------------------------------|------|-----------------|
| Korea, Democratic Republic of   | 1128 | [879.5-1446.8]  |
| Burundi                         | 1126 | [652.4-1943.4]  |
| United Kingdom                  | 1121 | [1035.8-1213.2] |
| Uzbekistan                      | 1103 | [969.5-1254.9]  |
| Bolivia, Plurinational State of | 1054 | [938.2-1184.1]  |
| Korea, Republic of              | 1014 | [921.6-1115.6]  |
| Italy                           | 1011 | [884.5-1155.6]  |
| Malaysia                        | 991  | [918.4-1069.3]  |
| Algeria                         | 930  | [786.6-1099.5]  |
| Guatemala                       | 872  | [786.9-966.3]   |
| Burkina Faso                    | 839  | [445.2-1581.2]  |
| Kazakhstan                      | 834  | [769.0-904.4]   |
| Rwanda                          | 829  | [596.9-1151.4]  |
| Sudan                           | 828  | [754.3-908.9]   |
| Afghanistan                     | 823  | [618.6-1094.9]  |
| Spain                           | 814  | [728.8-909.1]   |
| Ecuador                         | 813  | [728.1-907.9]   |
| Somalia                         | 812  | [470.5-1401.5]  |
| Chile                           | 799  | [702.5-908.7]   |
| Sri Lanka                       | 780  | [716.4-849.3]   |
| Egypt                           | 744  | [552.5-1001.8]  |
| Cuba                            | 715  | [624.6-818.5]   |
| Dominican Republic              | 714  | [644.6-790.9]   |
| Chad                            | 650  | [430.9-980.4]   |
| Papua New Guinea                | 650  | [211.8-1995.2]  |
| Paraguay                        | 648  | [545.3-770.0]   |
| Iran, Islamic Republic of       | 644  | [584.3-709.8]   |
| Cambodia                        | 643  | [400.7-1031.9]  |
| Canada                          | 637  | [572.7-708.5]   |
| Serbia                          | 634  | [559.1-718.9]   |
| South Sudan                     | 529  | [306.5-913.0]   |
| Honduras                        | 518  | [449.0-597.6]   |
| Bulgaria                        | 503  | [409.0-618.6]   |
| Hungary                         | 482  | [414.6-560.4]   |
| Niger                           | 475  | [221.7-1017.6]  |
| Liberia                         | 469  | [218.9-1004.8]  |
| Haiti                           | 439  | [380.1-507.0]   |
| Nicaragua                       | 413  | [350.4-486.8]   |
| Czechia                         | 398  | [338.6-467.8]   |
| Portugal                        | 379  | [323.2-444.5]   |
| Benin                           | 368  | [241.5-560.7]   |
| Sierra Leone                    | 367  | [336.9-399.8]   |
| Lesotho                         | 362  | [252.2-519.7]   |
| Belarus                         | 358  | [316.1-405.4]   |
| Australia                       | 328  | [274.3-392.3]   |
| El Salvador                     | 317  | [264.1-380.5]   |
| Togo                            | 309  | [218.6-436.7]   |
| Kyrgyzstan                      | 286  | [234.6-348.6]   |
| Mauritania                      | 286  | [133.5-612.7]   |
| Slovakia                        | 284  | [233.3-345.7]   |
| Greece                          | 282  | [226.4-351.2]   |

|                                  |     |               |
|----------------------------------|-----|---------------|
| Turkmenistan                     | 265 | [226.6-310.0] |
| Azerbaijan                       | 256 | [220.1-297.8] |
| The Netherlands                  | 253 | [202.2-316.6] |
| Republic of Moldova              | 248 | [206.1-298.4] |
| Jamaica                          | 247 | [211.0-289.1] |
| Belgium                          | 236 | [189.2-294.4] |
| Central African Republic         | 223 | [147.8-336.4] |
| Eswatini                         | 214 | [184.1-248.7] |
| Namibia                          | 214 | [183.8-249.1] |
| Congo, Republic of               | 214 | [158.7-288.5] |
| Botswana                         | 207 | [144.2-297.2] |
| Georgia                          | 204 | [160.4-259.4] |
| Sweden                           | 200 | [159.6-250.6] |
| The Republic of the Gambia       | 199 | [143.6-275.7] |
| Panama                           | 194 | [156.7-240.1] |
| Iraq                             | 193 | [160.8-231.6] |
| Lithuania                        | 193 | [160.1-232.7] |
| Costa Rica                       | 192 | [150.9-244.2] |
| Lao People's Democratic Republic | 191 | [119.0-306.5] |
| Tajikistan                       | 190 | [159.7-226.0] |
| Tunisia                          | 185 | [138.8-246.5] |
| Mongolia                         | 182 | [147.2-225.0] |
| Saudi Arabia                     | 179 | [75.2-426.2]  |
| Guinea-Bissau                    | 172 | [80.3-368.5]  |
| Singapore                        | 172 | [140.3-210.9] |
| Austria                          | 170 | [132.2-218.6] |
| Uruguay                          | 159 | [125.1-202.1] |
| Bosnia and Herzegovina           | 153 | [127.9-183.0] |
| Yemen                            | 153 | [63.6-368.3]  |
| Croatia                          | 150 | [115.8-194.3] |
| Libya                            | 141 | [95.8-207.5]  |
| Denmark                          | 140 | [79.8-245.6]  |
| Syrian Arab Republic             | 137 | [28.8-651.5]  |
| Latvia                           | 136 | [98.6-187.5]  |
| Eritrea                          | 130 | [75.3-224.4]  |
| Trinidad and Tobago              | 127 | [100.8-160.0] |
| Israel                           | 121 | [86.8-168.8]  |
| Gabon                            | 118 | [78.2-178.0]  |
| Armenia                          | 115 | [78.8-167.9]  |
| Comoros                          | 109 | [63.2-188.1]  |
| Ireland                          | 106 | [73.0-154.0]  |
| Switzerland                      | 100 | [74.2-134.7]  |
| Norway                           | 96  | [57.5-160.4]  |
| Fiji                             | 92  | [45.5-186.1]  |
| Puerto Rico                      | 83  | [58.9-117.0]  |
| New Zealand                      | 81  | [60.6-108.3]  |
| Albania                          | 74  | [53.0-103.3]  |
| Equatorial Guinea                | 73  | [48.4-110.1]  |
| Lebanon                          | 73  | [55.2-96.5]   |
| Jordan                           | 71  | [48.0-105.1]  |
| Finland                          | 67  | [50.8-88.3]   |

|                          |    |              |
|--------------------------|----|--------------|
| Guyana                   | 63 | [45.9-86.5]  |
| North Macedonia          | 62 | [45.7-84.1]  |
| Estonia                  | 62 | [43.8-87.7]  |
| Mauritius                | 61 | [36.7-101.5] |
| United Arab Emirates     | 59 | [38.0-91.7]  |
| Montenegro               | 54 | [38.5-75.8]  |
| Slovenia                 | 54 | [34.8-83.8]  |
| Oman                     | 50 | [30.5-81.9]  |
| Suriname                 | 48 | [33.4-69.1]  |
| Gaza Strip and West Bank | 44 | [9.3-209.2]  |
| Djibouti                 | 44 | [25.5-75.9]  |
| Solomon Islands          | 40 | [13.0-122.8] |
| Timor-Leste              | 39 | [24.3-62.6]  |
| France, La Réunion       | 37 | [22.2-61.5]  |
| Cyprus                   | 33 | [20.7-52.5]  |
| Kuwait                   | 28 | [17.3-45.2]  |
| Bahamas                  | 28 | [17.4-45.1]  |
| Bhutan                   | 27 | [23.9-30.5]  |
| Cabo Verde               | 27 | [15.5-47.0]  |
| Barbados                 | 26 | [15.9-42.5]  |
| Belize                   | 25 | [15.4-40.7]  |
| Maldives                 | 24 | [18.9-30.4]  |
| Vanuatu                  | 19 | [5.5-65.9]   |
| France, New Caledonia    | 17 | [8.5-33.9]   |
| France, Martinique       | 15 | [8.3-27.2]   |
| Brunei Darussalam        | 14 | [7.6-25.9]   |
| France, Guadeloupe       | 14 | [7.5-26.2]   |
| Saint Lucia              | 13 | [6.6-25.7]   |
| Bahrain                  | 12 | [5.7-25.5]   |
| Qatar                    | 11 | [2.3-52.3]   |
| Luxembourg               | 10 | [4.8-20.9]   |
| Guam                     | 10 | [3.6-28.0]   |
| Sao Tome and Principe    | 10 | [0.20-413.8] |
| French Guiana            | 9  | [3.8-21.3]   |
| French Polynesia         | 8  | [2.5-25.2]   |
| Samoa                    | 6  | [0.90-42.3]  |
| Iceland                  | 5  | [1.9-12.9]   |
| Malta                    | 5  | [1.9-13.3]   |

---
